# Supplementary material for: Bimetallic titanium complex catalyzed enantioselective oxidation of thioethers using aqueous H2O2as a terminal oxidant
Source: Royal Society of Chemistry journal article supplement (doi:10.1039/c5ra06528c), 2015-01-01
Supplement: c5ra06528c1.pdf [file c5ra06528c1.pdf]

## Bimetallic titanium complex catalyzed enantioselective oxidation of thioethers using aqueous H<sub>2</sub>O<sub>2</sub> as terminal oxidant

Prasanta Kumar Bera,<sup>a</sup> Naveen Gupta,<sup>a, b</sup> Sayed H. R. Abdi,\*<sup>a, b</sup> Noor-ul H. Khan,<sup>a, b</sup> Rukhsana I. Kureshy,<sup>a, b</sup> Hari C. Bajaj<sup>a, b</sup>

<sup>a</sup> Discipline of Inorganic Materials and Catalysis, CSIR-Central Salt and Marine Chemicals Research Institute (CSIR-CSMCRI), Council of Scientific & Industrial Research (CSIR), G. B. Marg, Bhavnagar, 364002, Gujarat, India. <sup>b</sup> Academy of Scientific and Innovative Research (AcSIR), CSIR-Central Salt and Marine Chemicals Research Institute (CSIR-CSMCRI), Council of Scientific & Industrial Research (CSIR), G. B. Marg, Bhavnagar, 364002, Gujarat, India.

Tel: +91-0278-2567760, Fax: +91-0278-2566970; E-mail: [shrabdi@csmcri.org](mailto:shrabdi@csmcri.org)

### Table of Contents

|                                                                                            |        |
|--------------------------------------------------------------------------------------------|--------|
| 1. Characterization data and HPLC condition of sulfoxides.....                             | 2-5.   |
| 2. ESI-MS analysis of <i>in situ</i> generated <b>L1</b> -Ti complex.....                  | 6.     |
| 3. <sup>1</sup> H and <sup>13</sup> C NMR spectra of dimeric ligands ( <b>L1-L7</b> )..... | 7-13.  |
| 4. HPLC chromatogram of racemic and chiral sulfoxides.....                                 | 14-28. |
| 5. Notes and references .....                                                              | 29.    |

## 1. Characterization data and of the sulfoxides

**Methyl phenyl sulfoxide<sup>1</sup>:** Colourless oil; Yield: 89%; ee: 91%; <sup>1</sup>H NMR (500 MHz, CDCl<sub>3</sub>):  $\delta$  = 7.66-7.64 (m, 2H), 7.53-7.48 (m, 3H), 2.71 (s, 3H) ppm; <sup>13</sup>C NMR (125 MHz, CDCl<sub>3</sub>):  $\delta$  = 145.1, 130.5, 128.9, 123.0, 43.3 ppm; The enantiomeric excess was determined by HPLC analysis. HPLC condition: Daicel Chiralcel OD column, 80:20 Hex/IPA, 0.5 ml/min, 30 °C, 254 nm;  $t_r$  (**R**) = 13.8 min,  $t_r$  (**S**) = 15.8 min.

**4-Methylphenyl methyl sulfoxide<sup>1</sup>:** White solid; Yield: 86%; ee: 94%; <sup>1</sup>H NMR (500 MHz, CDCl<sub>3</sub>):  $\delta$  = 7.54 (d,  $J$  = 8.0 Hz, 2H), 7.32 (d,  $J$  = 8 Hz, 2H), 2.70 (s, 3H), 2.41 (s, 3H) ppm; <sup>13</sup>C NMR (125 MHz, CDCl<sub>3</sub>):  $\delta$  = 142.1, 141.2, 129.7, 123.3, 43.6, 21.1 ppm; The enantiomeric excess was determined by HPLC analysis. HPLC condition: Daicel Chiralcel OD column, 94:06 Hex/IPA, 0.5 ml/min, 30 °C, 254 nm;  $t_r$  (**R**) = 32.2 min,  $t_r$  (**S**) = 35.8 min.

**4-Methoxyphenyl methyl sulfoxide<sup>1</sup>:** Yellow oil; Yield: 84%; ee: 82%; <sup>1</sup>H NMR (500 MHz, CDCl<sub>3</sub>):  $\delta$  = 7.45 (d,  $J$  = 7.8 Hz, 1H), 6.88 (d,  $J$  = 7.6 Hz, 1H), 3.70 (s, 3H), 2.56 (s, 3H) ppm; <sup>13</sup>C NMR (50 MHz, CDCl<sub>3</sub>):  $\delta$  = 161.5, 136.0, 125.0, 114.4, 55.1, 43.4 ppm; The enantiomeric excess was determined by HPLC analysis. HPLC condition: Daicel Chiralcel OD column, 90:10 Hex/IPA, 0.7 ml/min, 30 °C, 254 nm;  $t_r$  (**R**) = 21.7 min,  $t_r$  (**S**) = 23.3 min.

**4-Fluorophenyl methyl sulfoxide<sup>2</sup>:** Colourless oil; Yield: 84%; ee: 84%; <sup>1</sup>H NMR (500 MHz, CDCl<sub>3</sub>):  $\delta$  = 7.69-7.66 (m, 2H), 7.25-7.22 (m, 2H), 2.73 (s, 3H) ppm; <sup>13</sup>C NMR (125 MHz, CDCl<sub>3</sub>):  $\delta$  = 165.0, 163.0, 140.8, 125.7, 125.6, 116.5, 116.3, 43.8 ppm; The enantiomeric excess was determined by HPLC analysis. HPLC condition: Daicel Chiralcel OD column, 92:08 Hex/IPA, 0.4 ml/min, 30 °C, 254 nm;  $t_r$  (**R**) = 32.3 min,  $t_r$  (**S**) = 34.7 min.

**4-Chlorophenyl methyl sulfoxide<sup>1</sup>:** Colourless oil; Yield: 81%; ee: 91%; <sup>1</sup>H NMR (500 MHz, CDCl<sub>3</sub>): δ = 7.61 (d, *J* = 8.5 Hz, 2H), 7.51 (d, *J* = 8.5 Hz, 2H), 2.73 (s, 3H) ppm; <sup>13</sup>C NMR (125 MHz, CDCl<sub>3</sub>): δ = 143.8, 136.7, 129.2, 124.6, 43.6 ppm; The enantiomeric excess was determined by HPLC analysis. HPLC condition: Daicel Chiralcel OB column, 80:20 Hex/IPA, 0.7 ml/min, 30 °C, 254 nm; t<sub>r</sub> (**R**) = 11.5 min, t<sub>r</sub> (**S**) = 16.9 min.

**4-Bromophenyl methyl sulfoxide<sup>1</sup>:** White solid; Yield: 83%; ee: 95%; <sup>1</sup>H NMR (500 MHz, CDCl<sub>3</sub>): δ = 7.67 (d, *J* = 8.5 Hz, 2H), 7.53 (d, *J* = 8.5 Hz, 2H), 2.73 (s, 3H) ppm; <sup>13</sup>C NMR (125 MHz, CDCl<sub>3</sub>): δ = 144.7, 132.5, 125.4, 125.1, 43.8 ppm; The enantiomeric excess was determined by HPLC analysis. HPLC condition: Daicel Chiralcel OB column, 80:20 Hex/IPA, 0.5 ml/min, 30 °C, 254 nm; t<sub>r</sub> (**R**) = 17.6 min, t<sub>r</sub> (**S**) = 24.3 min.

**4-Nitrophenyl methyl sulfoxide<sup>1</sup>:** White solid; Yield: 64%; ee: 99%; <sup>1</sup>H NMR (500 MHz, CDCl<sub>3</sub>): δ = 8.40 (d, *J* = 8.5 Hz, 2H), 7.86 (d, *J* = 8.5 Hz, 2H), 2.82 (s, 3H) ppm; <sup>13</sup>C NMR (125 MHz, CDCl<sub>3</sub>): δ = 153.1, 149.4, 124.6, 124.4, 43.8 ppm; The enantiomeric excess was determined by HPLC analysis. HPLC condition: Daicel Chiralcel OJ column, 65:35 Hex/IPA, 0.5 ml/min, 30 °C, 254 nm; t<sub>r</sub> (**R**) = 22.3 min, t<sub>r</sub> (**S**) = 25.8 min.

**3-Chlorophenyl methyl sulfoxide<sup>3</sup>:** Colourless oil; Yield: 79%; ee: 91%; <sup>1</sup>H NMR (500 MHz, CDCl<sub>3</sub>): δ = 7.67 (s, 1H), 7.52-7.49 (m, 1H), 7.48-7.46 (m, 2H), 2.75 (s, 3H) ppm; <sup>13</sup>C NMR (125 MHz, CDCl<sub>3</sub>): δ = 147.5, 135.4, 130.9, 130.4, 123.3, 121.4, 43.7 ppm; The enantiomeric excess was determined by HPLC analysis. HPLC condition: Daicel Chiralcel OB column, 90:10 Hex/IPA, 1.0 ml/min, 30 °C, 254 nm; t<sub>r</sub> (**R**) = 12.5 min, t<sub>r</sub> (**S**) = 18.9 min.

**3-Bromophenyl methyl sulfoxide<sup>4</sup>:** Colorless oil; Yield: 80%; ee: 85%; <sup>1</sup>H NMR (200 MHz, CDCl<sub>3</sub>): δ = 7.82 (s, 1H), 7.65-7.53 (m, 2H), 7.47-7.32 (m, 1H), 2.75 (s, 3H) ppm; <sup>13</sup>C NMR (50

MHz, CDCl<sub>3</sub>):  $\delta$  = 147.9, 134.1, 130.8, 126.4, 123.5, 122.1, 44.0 ppm; The enantiomeric excess was determined by HPLC analysis. HPLC condition: Daicel Chiralcel OB column, 80:20 Hex/IPA, 1.0 ml/min, 30 °C, 254 nm;  $t_r$  (**R**) = 8.9 min,  $t_r$  (**S**) = 13.6 min.

**Ethyl phenyl sulfoxide**<sup>1</sup>: Colourless oil; Yield: 84%; ee: 78%; <sup>1</sup>H NMR (500 MHz, CDCl<sub>3</sub>):  $\delta$  = 7.62-7.60 (m, 2H), 7.54-7.49 (m, 3H), 2.95-2.87 (m, 1H), 2.81-2.74 (m, 1H), 1.20 (t,  $J$  = 7.5, 3H) ppm; <sup>13</sup>C NMR (125 MHz, CDCl<sub>3</sub>):  $\delta$  = 143.0, 130.8, 129.0, 124.0, 50.1, 5.8 ppm; The enantiomeric excess was determined by HPLC analysis. HPLC condition: Daicel Chiralcel OD column, 90:10 Hex/IPA, 0.5 ml/min, 30 °C, 254 nm;  $t_r$  (**R**) = 19.4 min,  $t_r$  (**S**) = 23.3 min.

**Benzyl phenyl sulfoxide**<sup>1</sup>: White solid; Yield: 81%; ee: 79%; <sup>1</sup>H NMR (500 MHz, CDCl<sub>3</sub>):  $\delta$  = 7.46-7.37 (m, 5H), 7.29-7.23 (m, 3H), 6.98 (m, 2H), 4.12 (d,  $J$  = 12.5 Hz, 1H), 4.00 (d,  $J$  = 12.5 Hz, 1H) ppm; <sup>13</sup>C NMR (125 MHz, CDCl<sub>3</sub>):  $\delta$  = 142.6, 131.2, 130.3, 129.1, 128.8, 128.4, 128.2, 124.4, 63.5 ppm; The enantiomeric excess was determined by HPLC analysis. HPLC condition: Daicel Chiralcel OD column, 90:10 Hex/IPA, 0.5 ml/min, 30 °C, 254 nm;  $t_r$  (**R**) = 24.1 min,  $t_r$  (**S**) = 28.8 min.

**(+)-trans-(1*S*,2*S*)-2-Phenyl-1,3-dithiane 1-oxide**<sup>5</sup>: White solid; Yield: 93%; ee: 84%; <sup>1</sup>H NMR (500 MHz, CDCl<sub>3</sub>):  $\delta$  = 7.43-7.37 (m, 5H), 4.55 (s, 1H), 3.57-3.56 (m, 1H), 2.90-2.84 (m, 1H), 2.78-2.72 (m, 1H), 2.68-2.65 (m, 1H), 2.62-2.49 (m, 1H), 2.40-2.31 (m, 1H) ppm; <sup>13</sup>C NMR (125 MHz, CDCl<sub>3</sub>):  $\delta$  = 133.3, 129.3, 129.0, 128.7, 69.6, 54.7, 31.3, 29.4 ppm; The enantiomeric excess was determined by HPLC analysis. HPLC condition: Daicel Chiralcel OD column, 70:30 Hex/IPA, 0.7 ml/min, 30 °C, 254 nm;  $t_r$  (**minor**) = 13.3 min,  $t_r$  (**major**) = 26.4 min.

**(+)-trans-2-(4-Methylphenyl)-1,3-dithiane 1-oxide**<sup>5</sup>: White solid; Yield: 94%; ee: 78%; <sup>1</sup>H NMR (200 MHz, CDCl<sub>3</sub>):  $\delta$  = 7.31 (d,  $J$  = 8Hz 2H), 7.20 (d,  $J$  = 8Hz, 2H), 4.54 (s, 1H), 3.59-

3.53 (m, 1H), 2.96-2.62 (m, 3H), 2.58-2.43 (m, 2H), 2.34 (s, 3H) ppm;  $^{13}\text{C}$  NMR (50 MHz,  $\text{CDCl}_3$ ):  $\delta$  = 139.3, 130.2, 129.8, 128.5, 69.4, 31.4, 29.5, 21.2 ppm; The enantiomeric excess was determined by HPLC analysis. HPLC condition: Daicel Chiralcel OD column, 70:30 Hex/IPA, 0.7 ml/min, 30 °C, 254 nm;  $t_r$  (*minor*) = 12.9 min,  $t_r$  (*major*) = 22.9 min.

**(+)-trans-2-(4-Chlorophenyl)-1,3-dithiane 1-Oxide<sup>5</sup>**: White solid; Yield: 94%; ee: 95%;  $^1\text{H}$  NMR (500 MHz,  $\text{CDCl}_3$ ):  $\delta$  = 7.36 (d,  $J$  = 5Hz, 4H), 4.53 (s, 1H), 3.58-3.56 (m, 1H), 2.90-2.85 (m, 1H), 2.79-2.73 (m, 1H), 2.70-2.67 (m, 1H), 2.54-2.51 (m, 1H), 2.40-2.32 (m, 1H) ppm;  $^{13}\text{C}$  NMR (125 MHz,  $\text{CDCl}_3$ ):  $\delta$  = 135.3, 131.8, 130.0, 129.3, 68.8, 54.7, 31.3, 29.4 ppm; The enantiomeric excess was determined by HPLC analysis. HPLC condition: Daicel Chiralcel OD column, 70:30 Hex/IPA, 0.7 ml/min, 30 °C, 254 nm;  $t_r$  (*minor*) = 14.1 min,  $t_r$  (*major*) = 33.9 min.

**(+)-trans-2-(2-Fluorophenyl)-1,3-dithiane 1-oxide<sup>5</sup>**: White solid; Yield: 92%; ee: 84%;  $^1\text{H}$  NMR (200 MHz,  $\text{CDCl}_3$ ):  $\delta$  = 7.36-7.29 (m, 2H), 7.05-6.97 (m, 2H), 4.48 (s, 1H), 3.51-3.45 (m, 1H), 2.87-2.62 (m, 3H), 2.49-2.23 (m, 2H) ppm;  $^{13}\text{C}$  NMR (50 MHz,  $\text{CDCl}_3$ ):  $\delta$  = 165.5, 160.6, 130.5, 130.4, 129.2, 129.1, 116.2, 115.8, 68.6, 54.6, 31.3, 29.4 ppm; The enantiomeric excess was determined by HPLC analysis. HPLC condition: Daicel Chiralcel OD column, 70:30 Hex/IPA, 0.7 ml/min, 30 °C, 254 nm;  $t_r$  (*minor*) = 12.9 min,  $t_r$  (*major*) = 33.6 min.

2. (a) ESI-MS analysis of *in situ* generated L1-Ti complex at L1:Ti = 1:1.

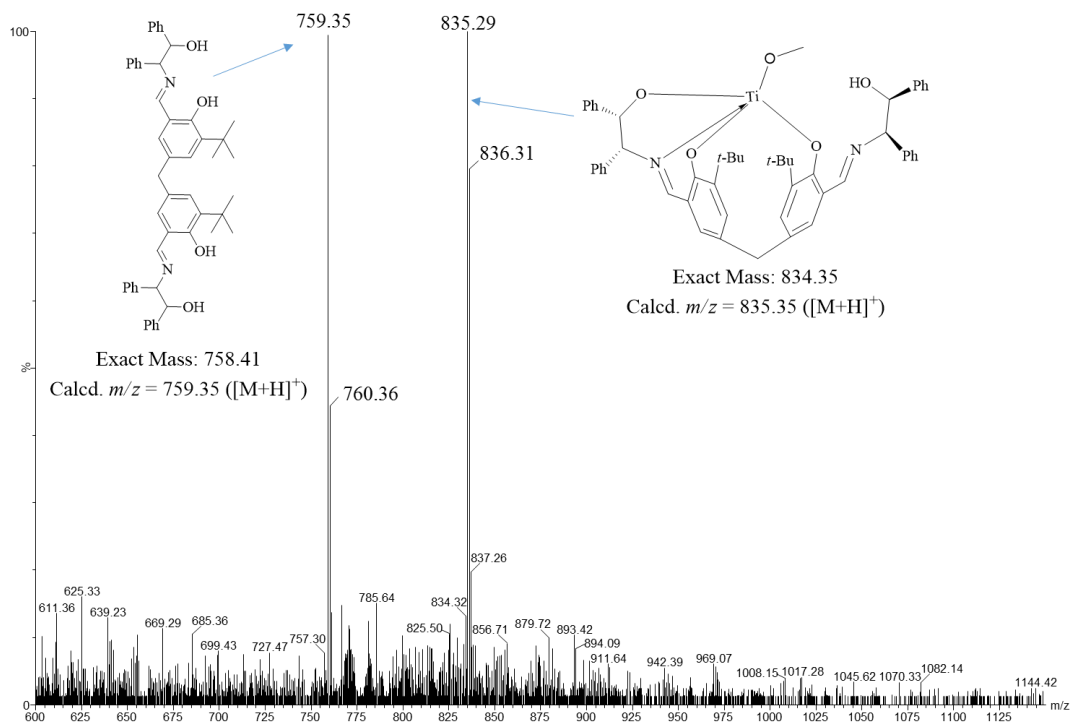

(b) ESI-MS analysis of *in situ* generated L1-Ti complex at L1:Ti = 1:2.

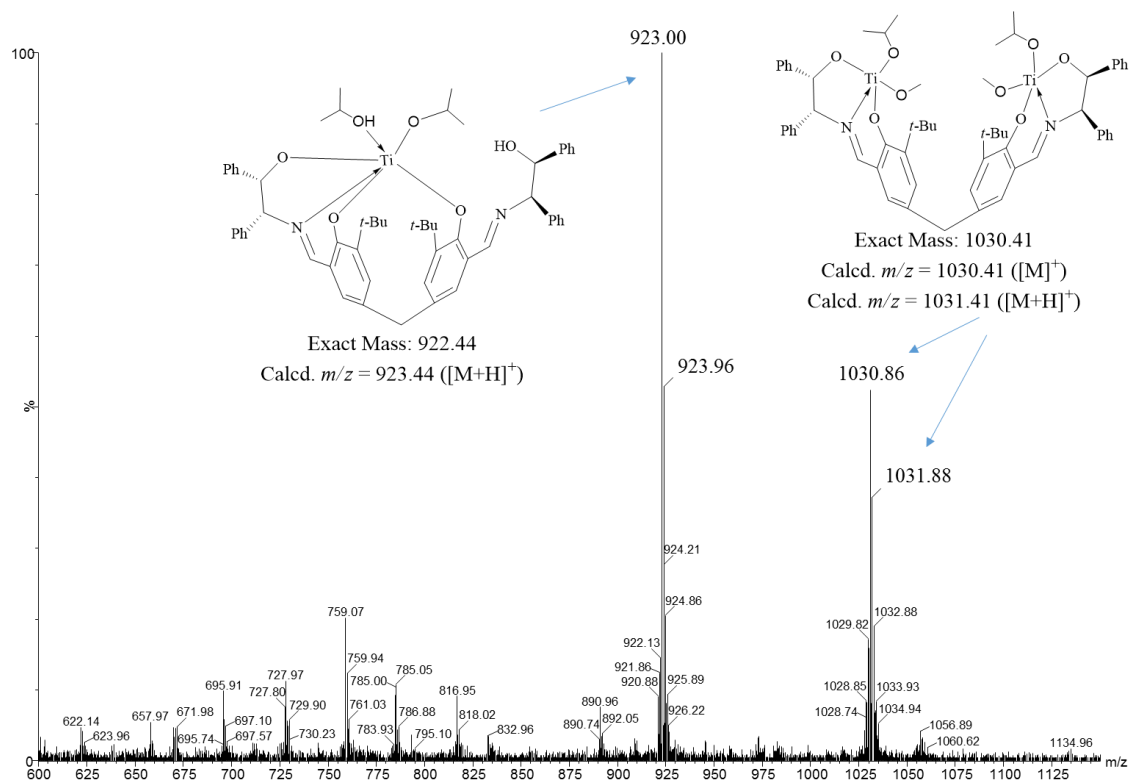

### 3. $^1\text{H}$ and $^{13}\text{C}$ NMR spectra of dimeric ligands (L1-L7)

#### Ligand L1

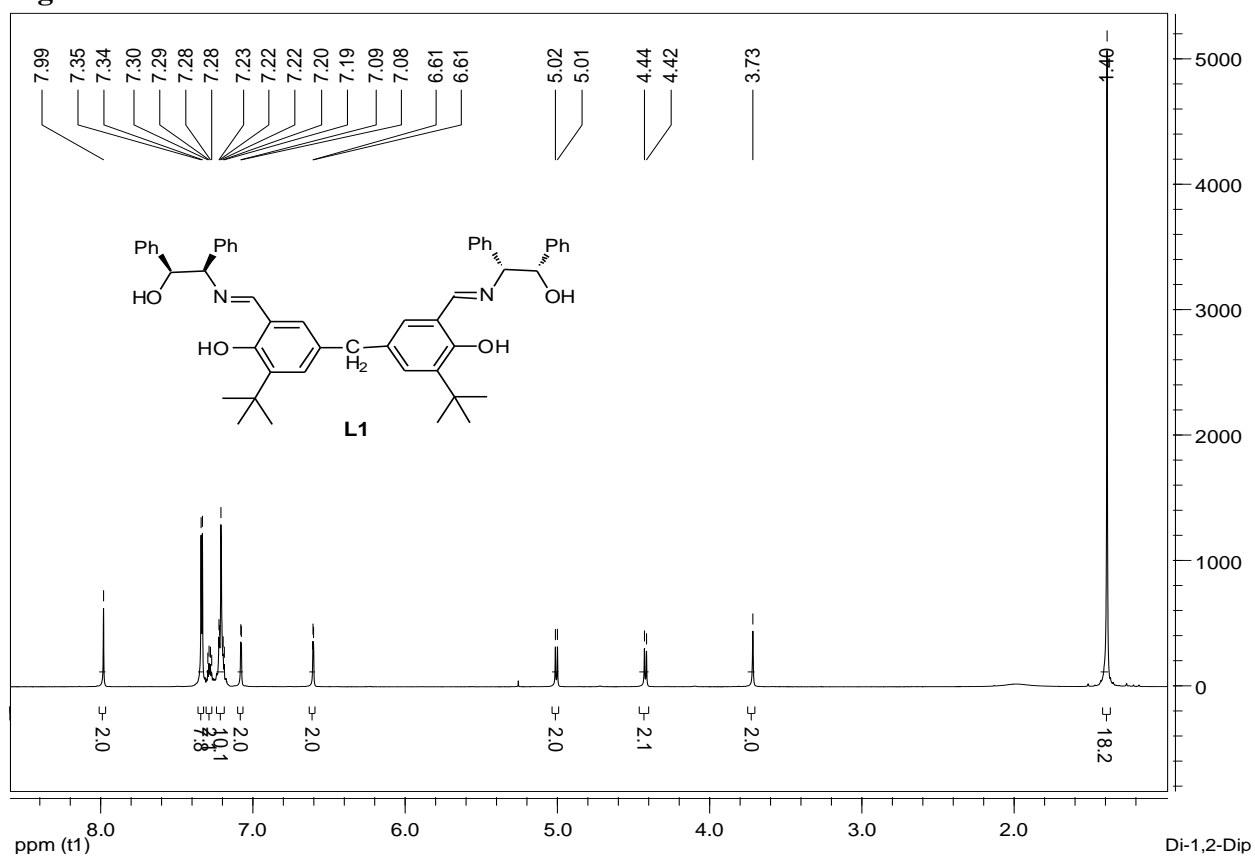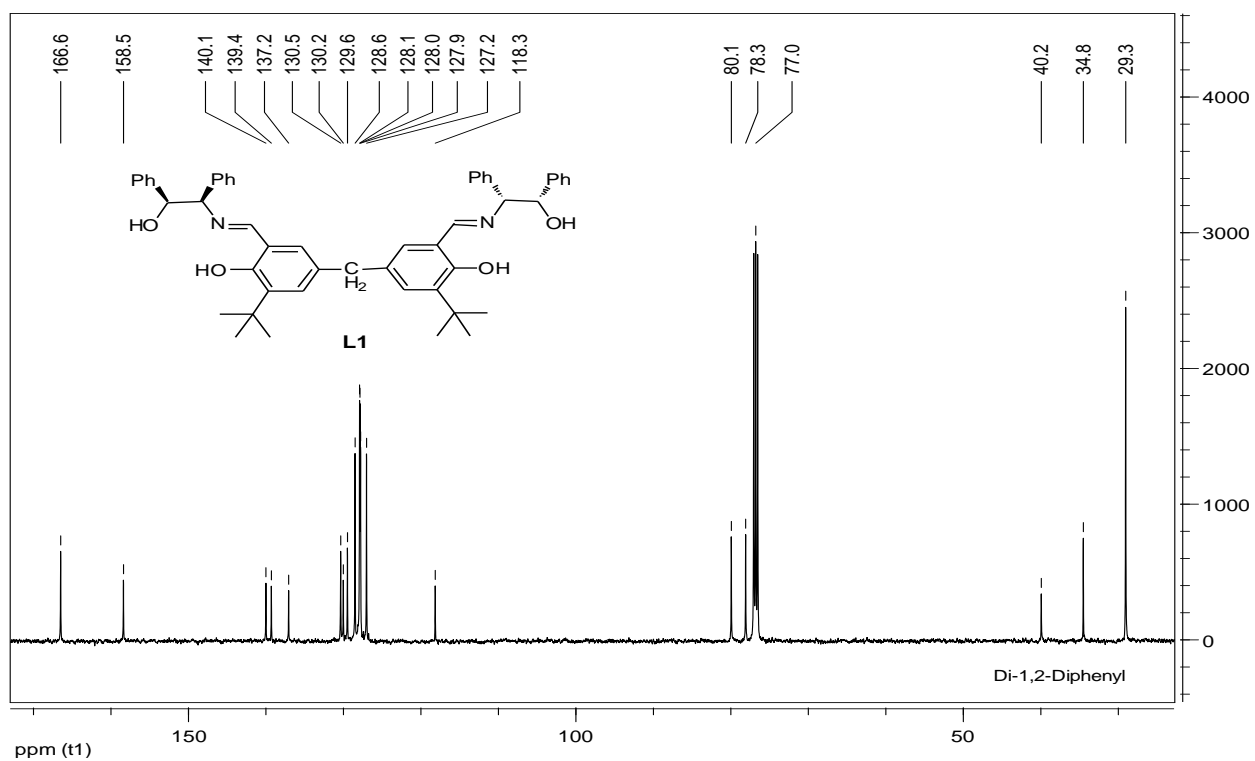

# Ligand L2

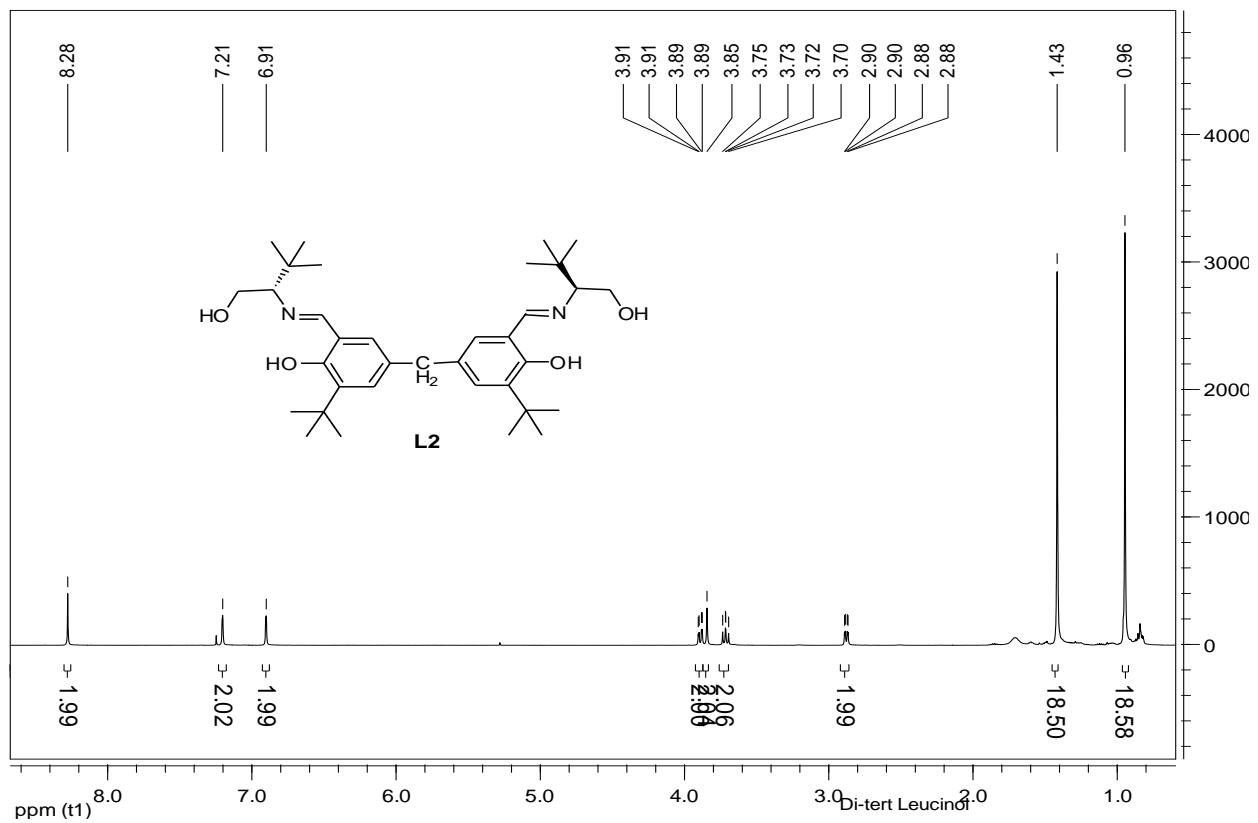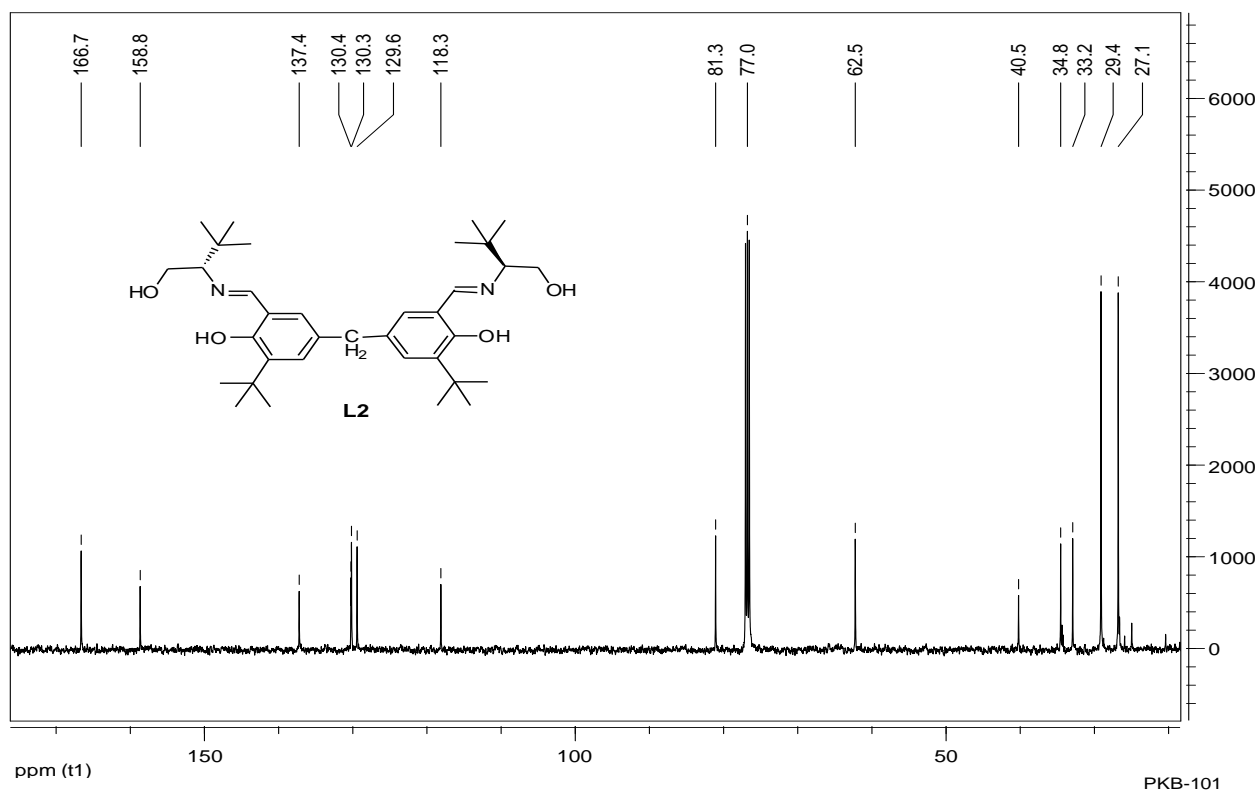



# Ligand L3

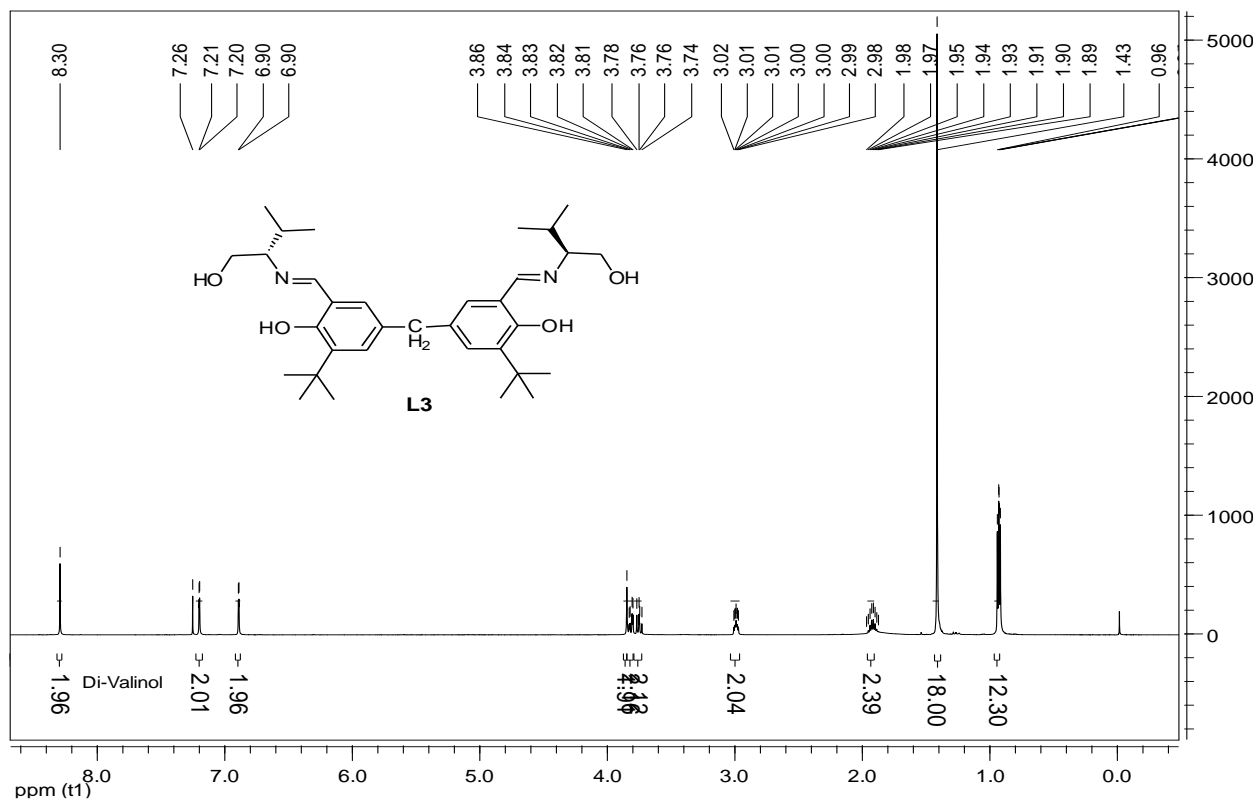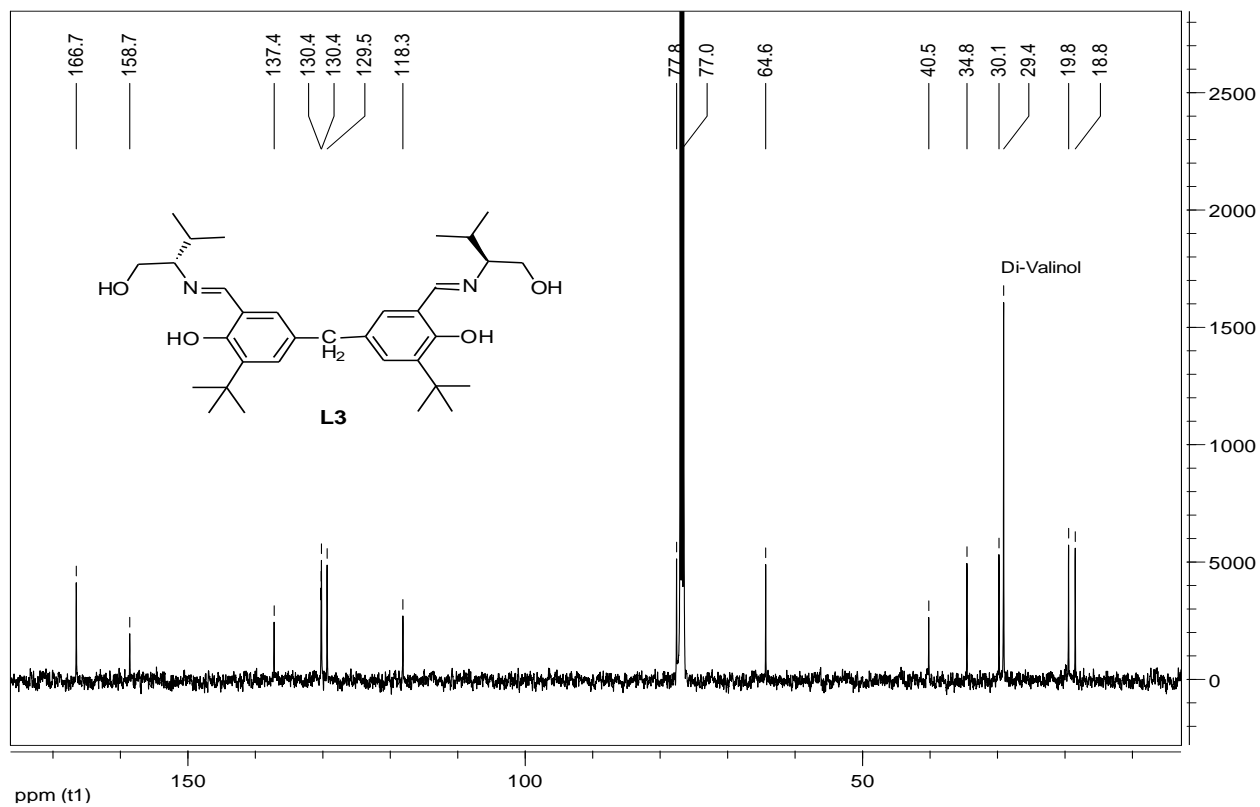

# Ligand L4

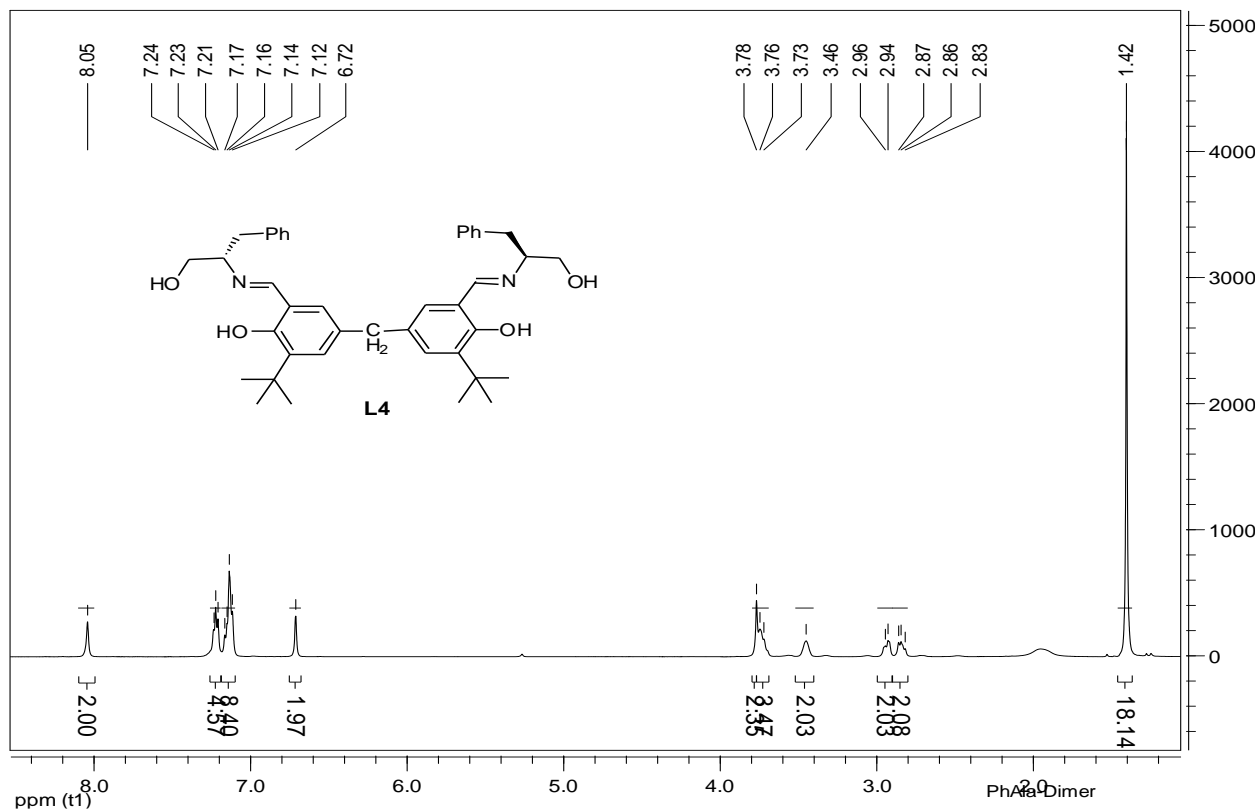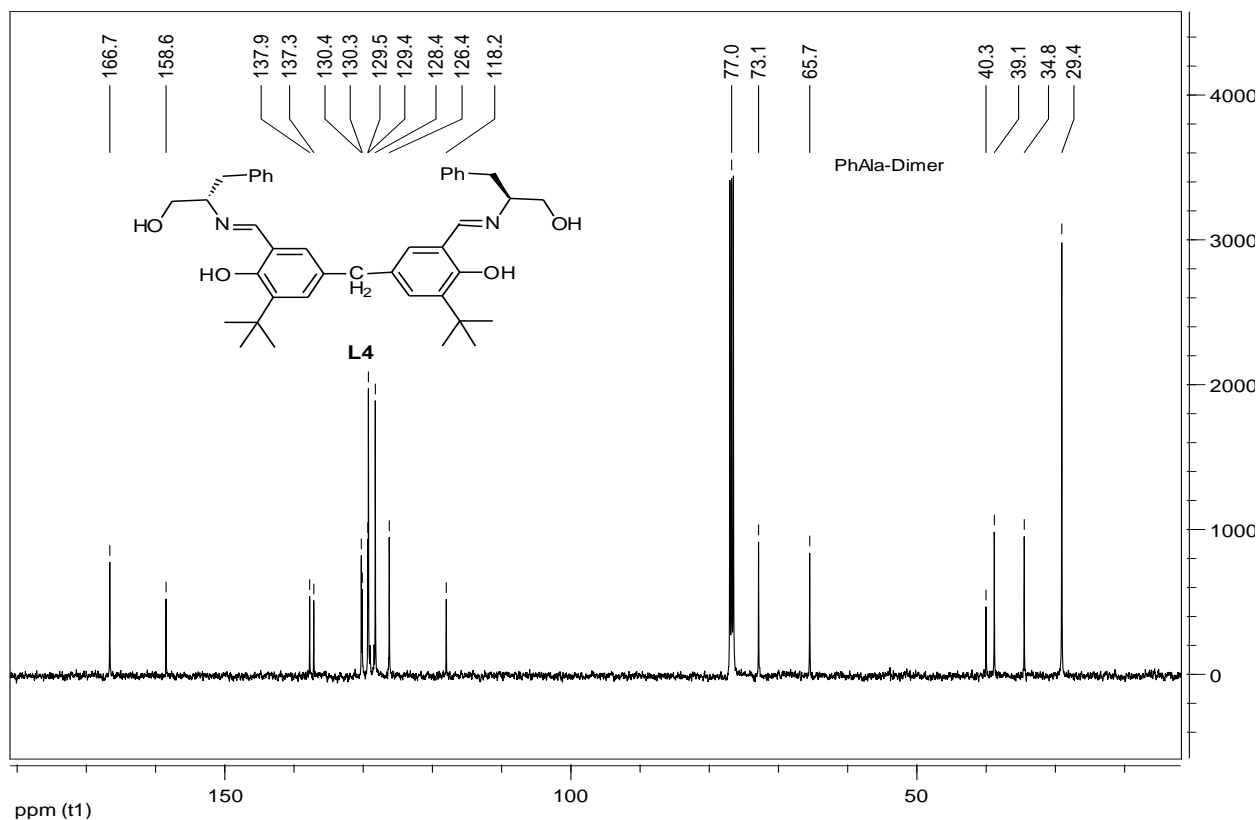

# Ligand L5

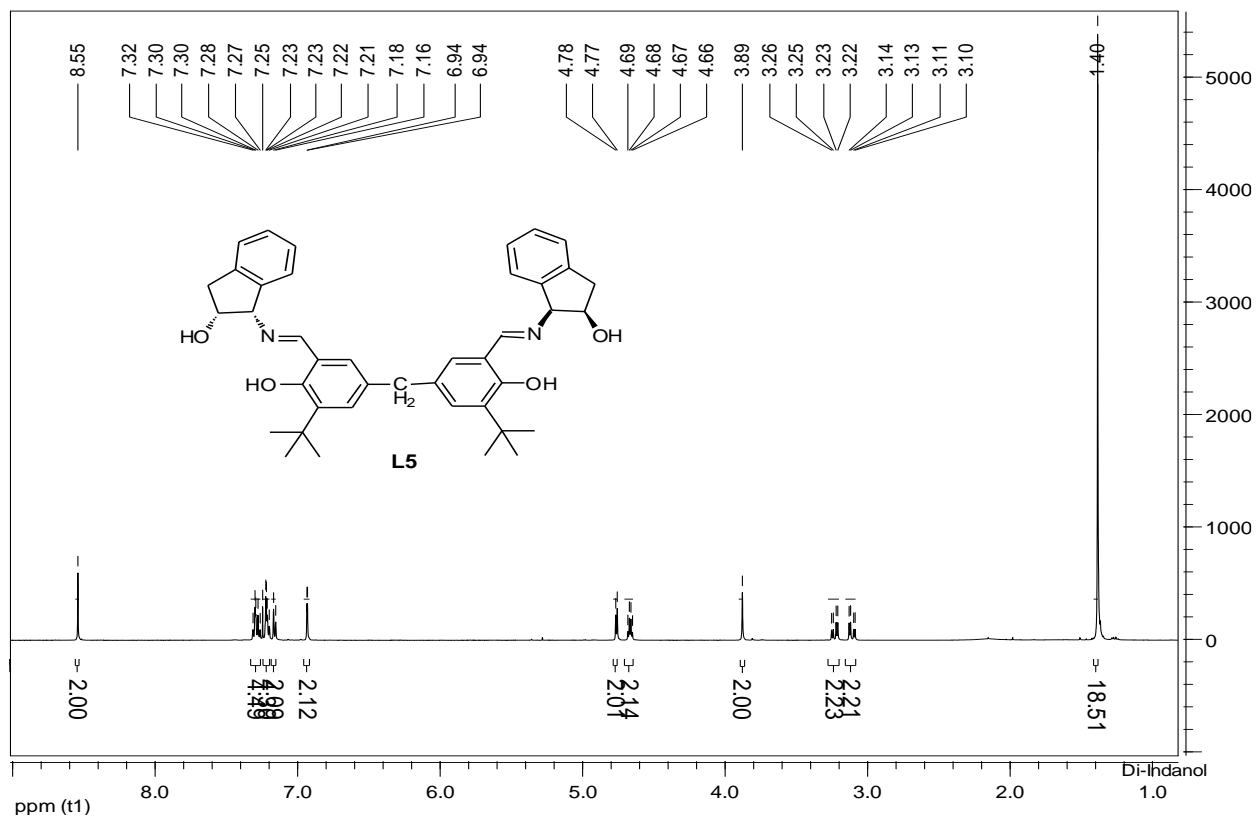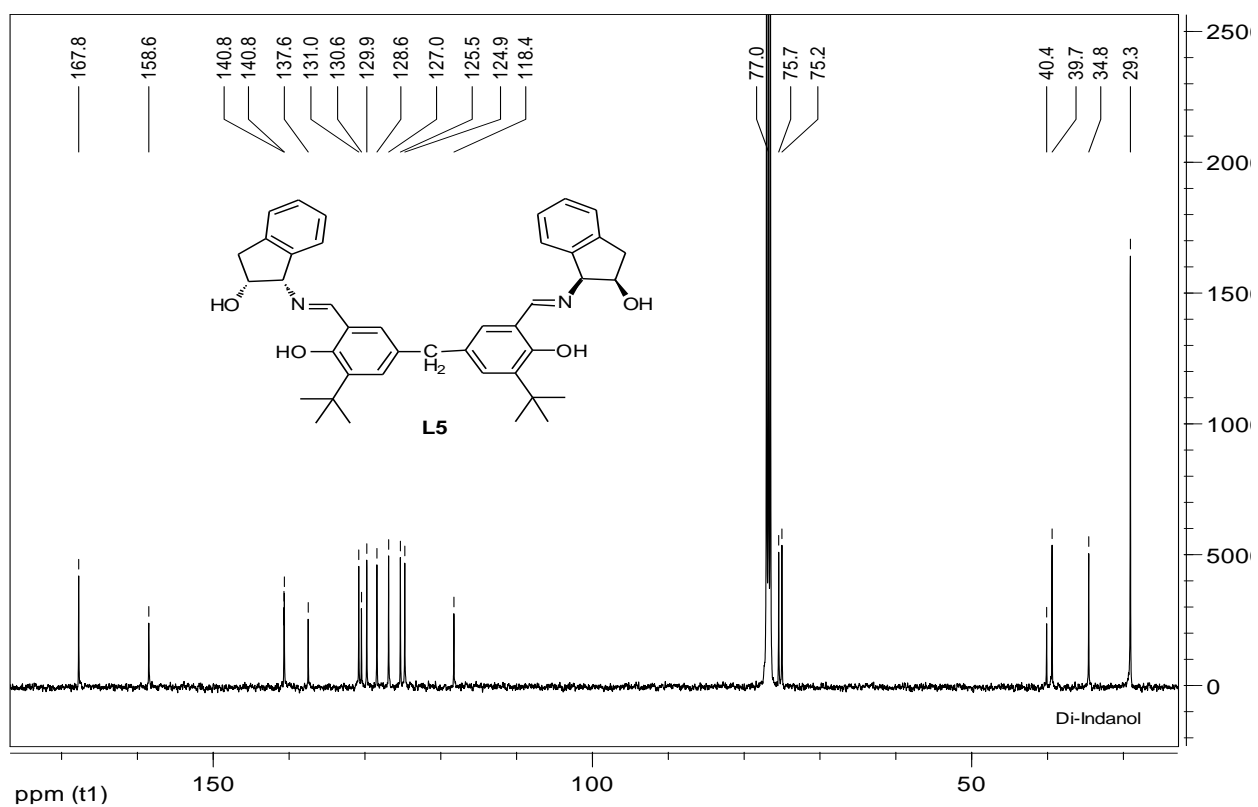

# Ligand L6

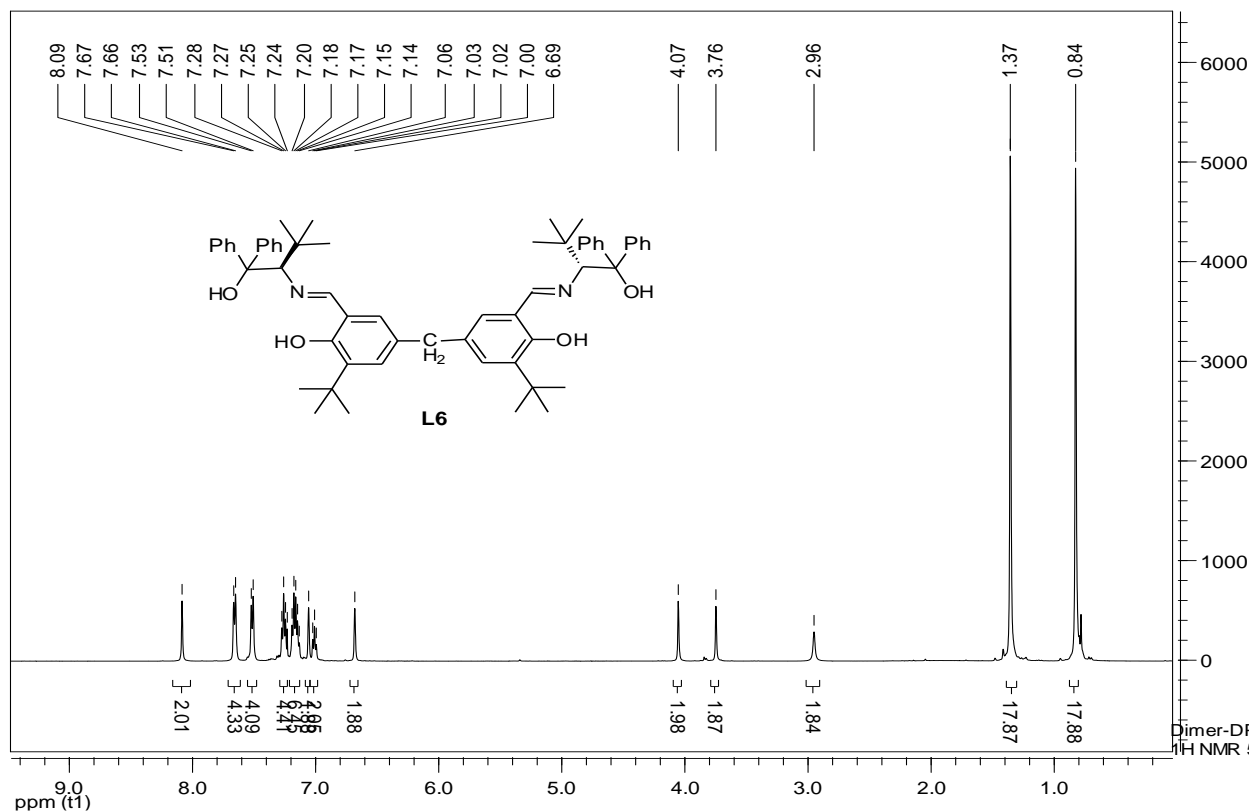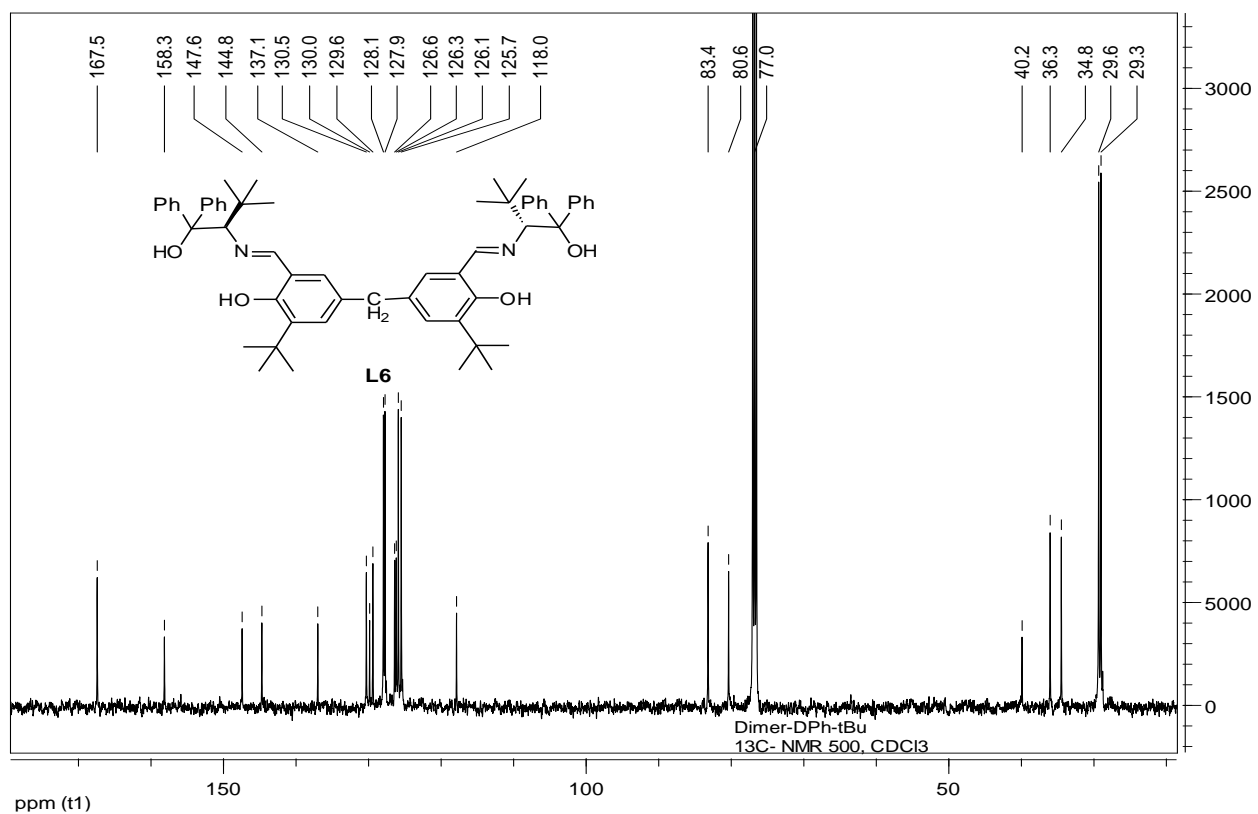

# Ligand L7

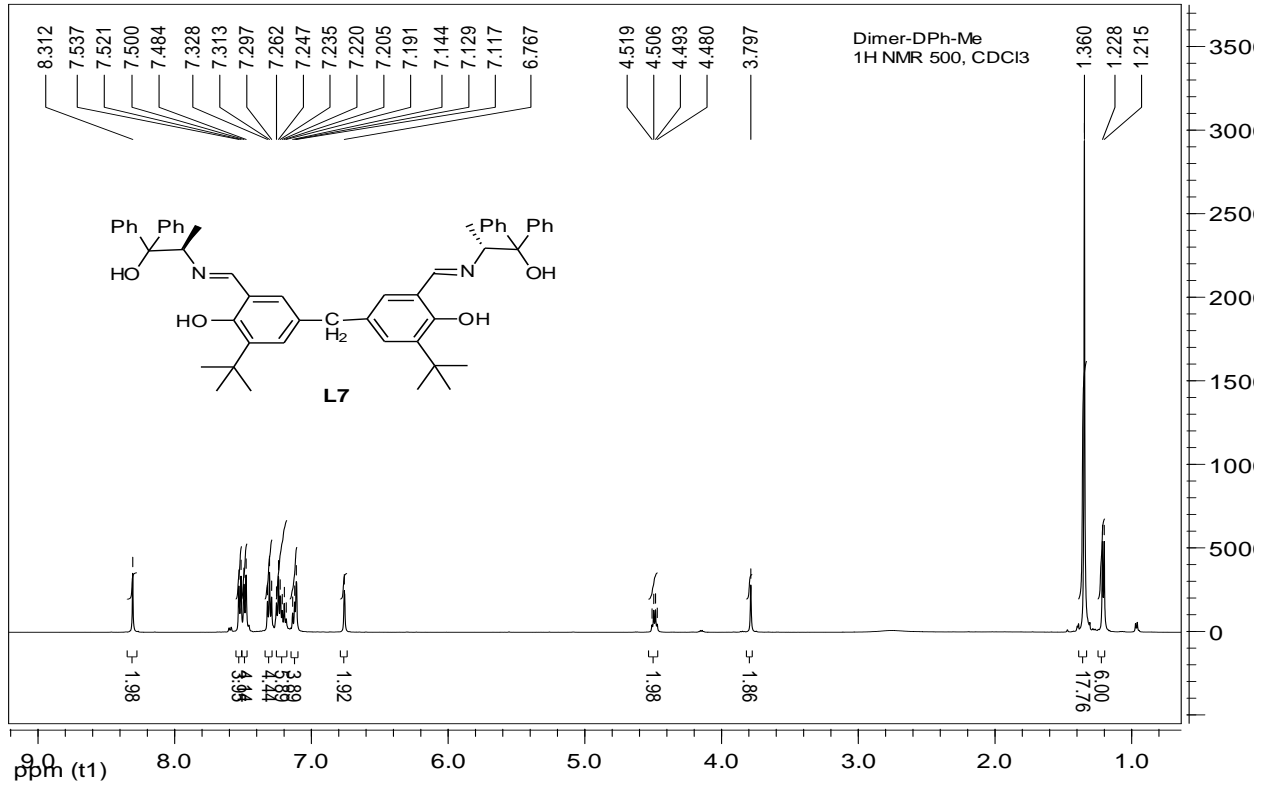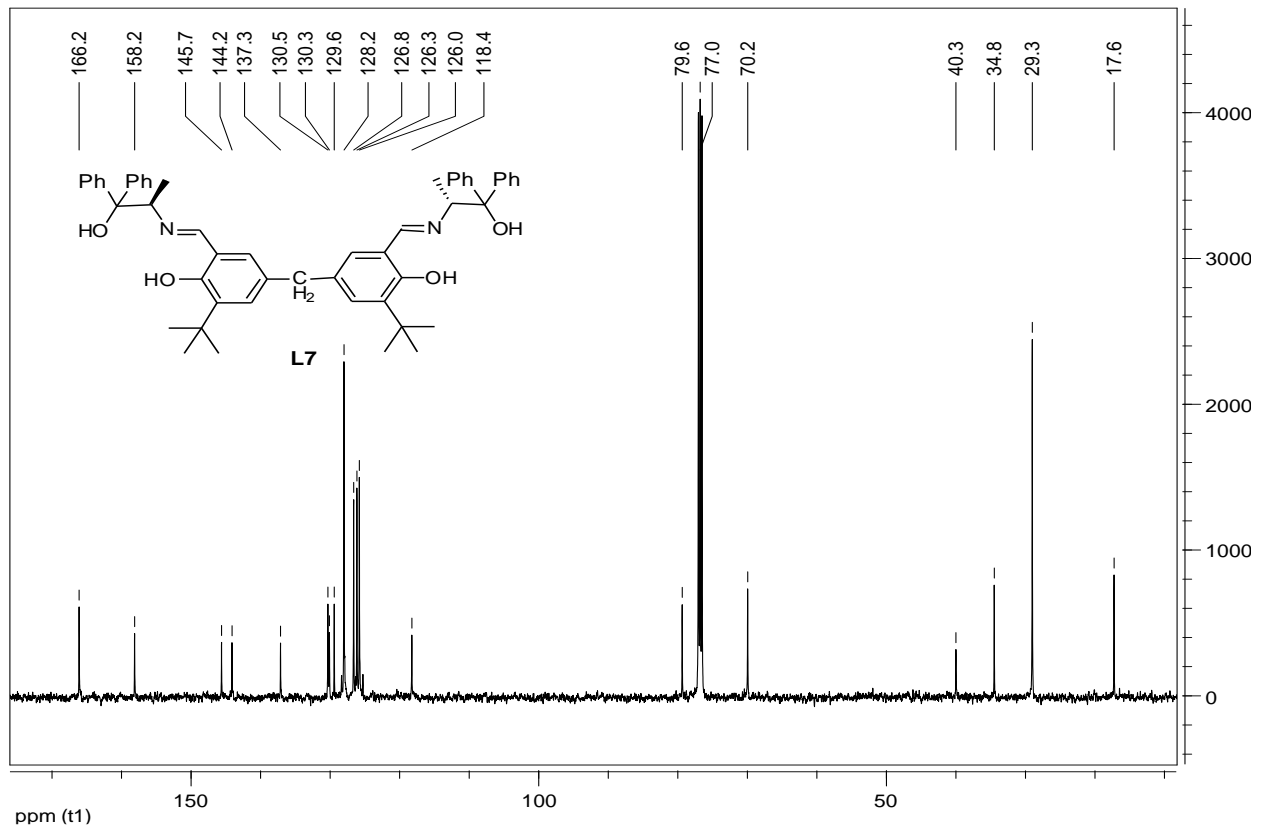

#### 4. HPLC chromatogram of racemic and chiral sulfoxides

##### Phenyl methyl sulfoxide

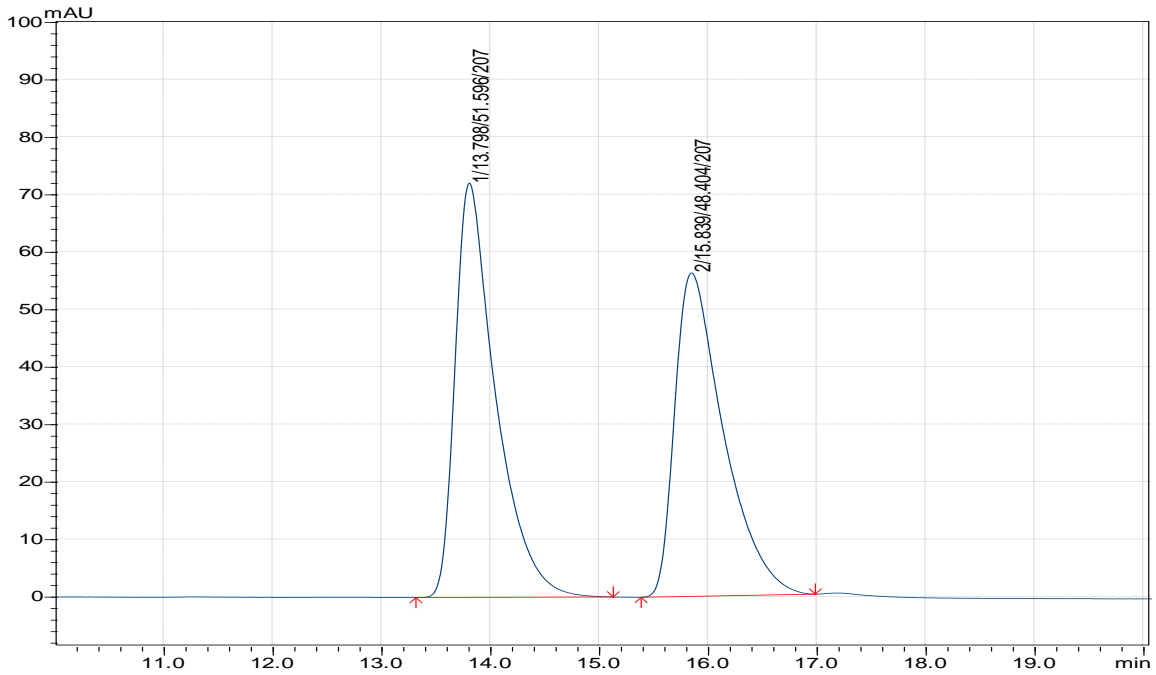

| Ret. Time | Area    | Peak Start | Peak End | Area%   |
|-----------|---------|------------|----------|---------|
| 13.798    | 1864485 | 13.312     | 15.125   | 51.5957 |
| 15.839    | 1749161 | 15.381     | 16.981   | 48.4043 |

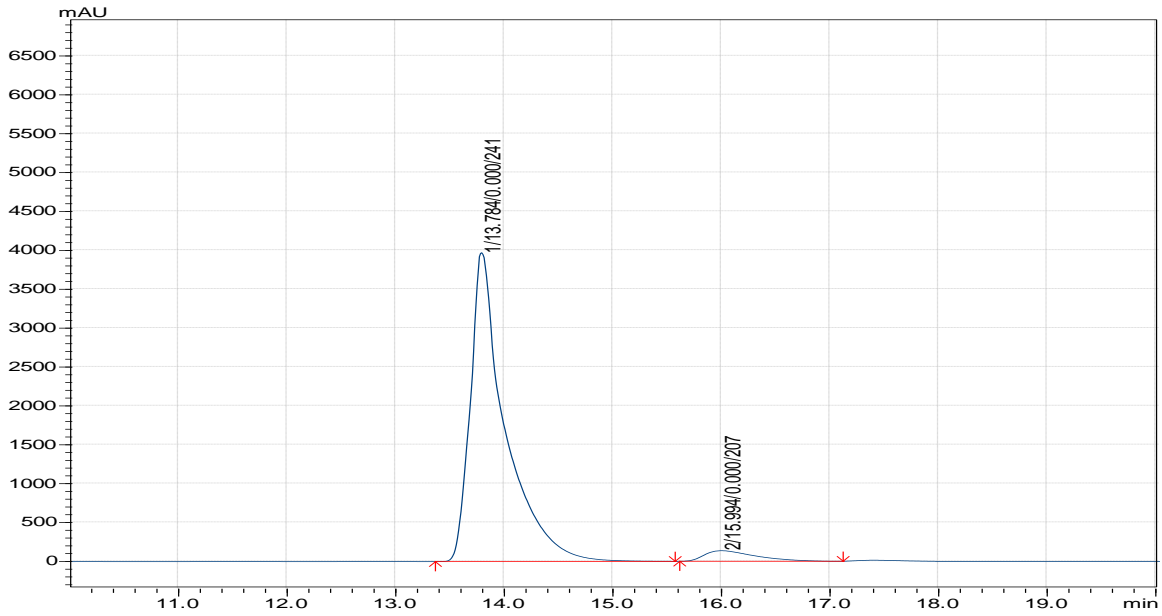

| Ret. Time | Area      | Peak Start | Peak End | Area%   |
|-----------|-----------|------------|----------|---------|
| 13.835    | 101215329 | 13.365     | 17.120   | 95.2059 |
| 15.994    | 5096672   | 15.573     | 17.120   | 4.7941  |

### 4-Methylphenyl methyl sulfoxide

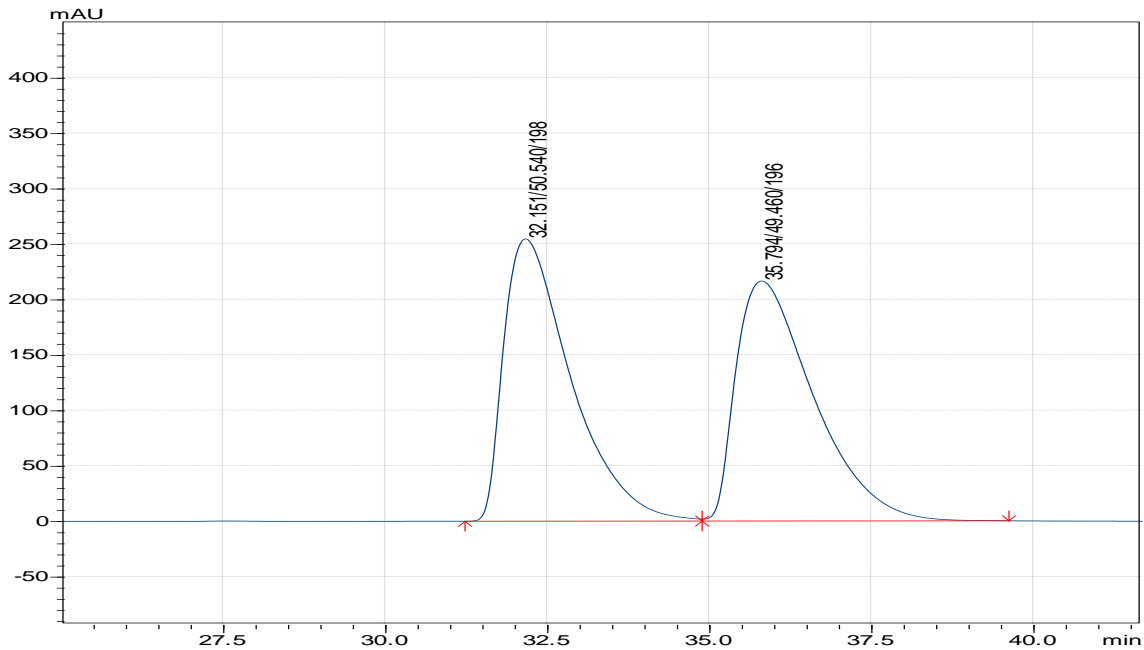

| Ret. Time | Area     | Peak Start | Peak End | Area%   |
|-----------|----------|------------|----------|---------|
| 32.151    | 18389022 | 31.221     | 34.880   | 50.5395 |
| 35.794    | 17996409 | 34.880     | 39.616   | 49.4605 |

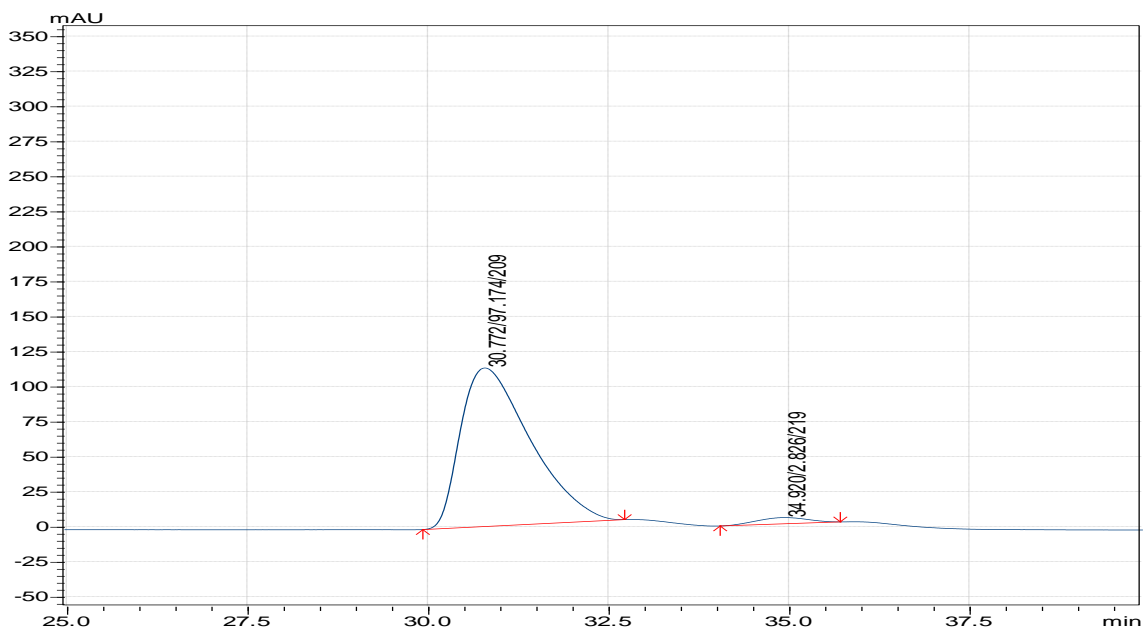

| Ret. Time | Area    | Peak Start | Peak End | Area%   |
|-----------|---------|------------|----------|---------|
| 30.772    | 7594068 | 29.920     | 32.715   | 97.1741 |
| 34.920    | 220838  | 34.037     | 35.701   | 2.8259  |

### 4-Methoxyphenyl methyl sulfoxide

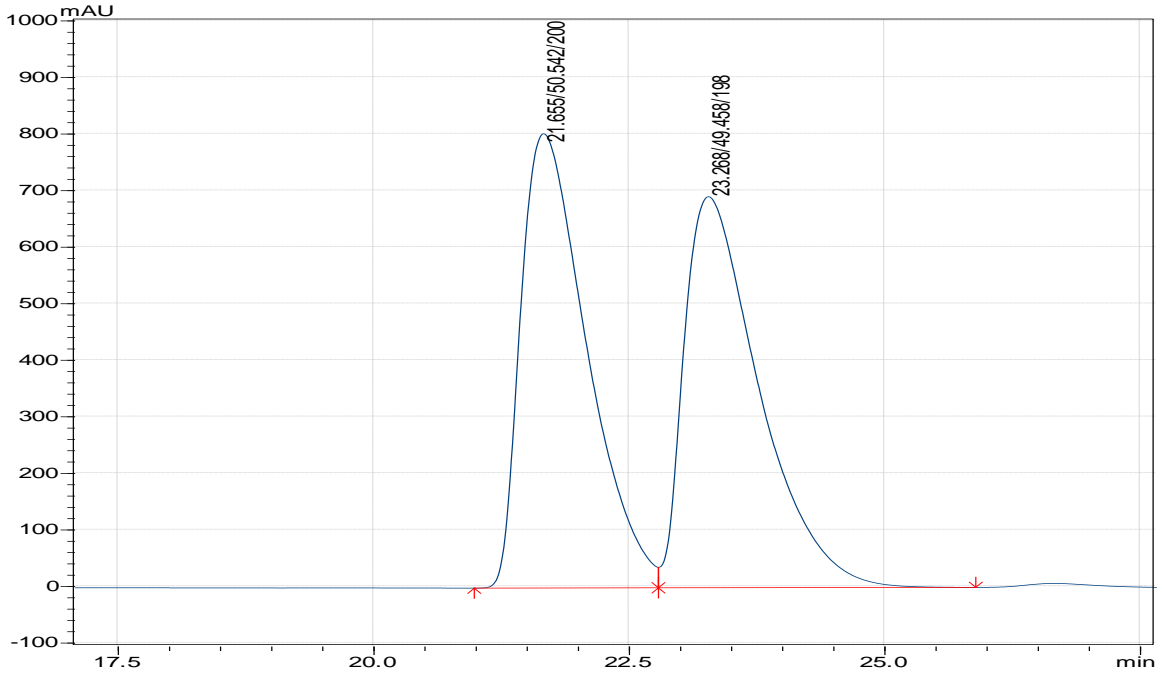

| Ret. Time | Area     | Peak Start | Peak End | Area%   |
|-----------|----------|------------|----------|---------|
| 21.655    | 36059168 | 20.981     | 22.784   | 50.5422 |
| 23.268    | 35285457 | 22.784     | 25.888   | 49.4578 |

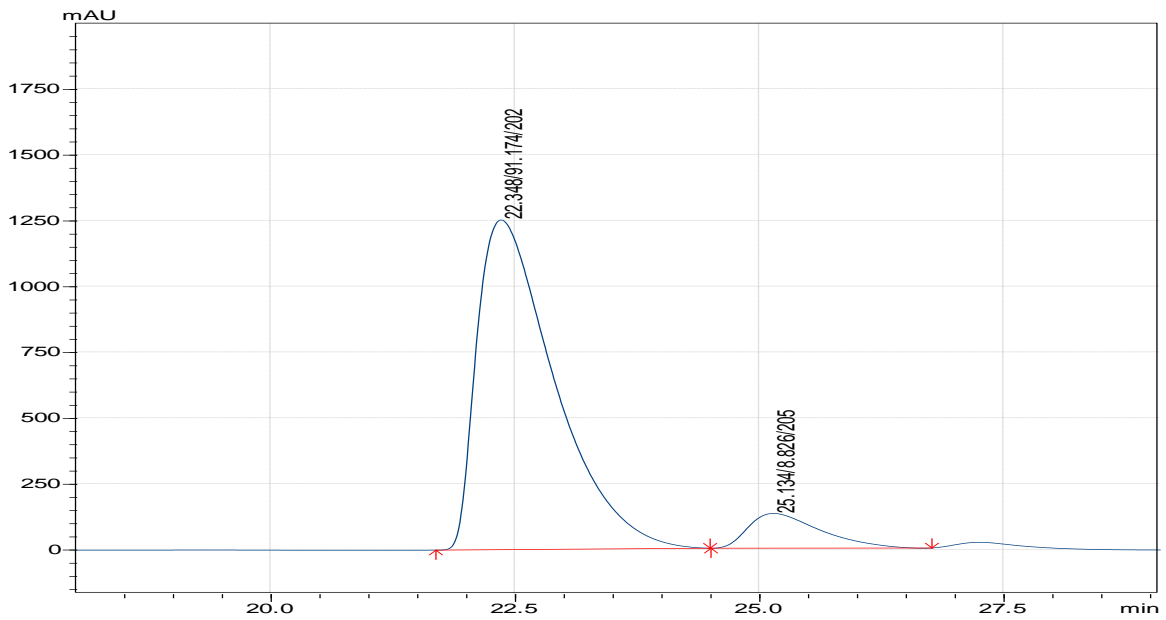

| Ret. Time | Area     | Peak Start | Peak End | Area%   |
|-----------|----------|------------|----------|---------|
| 22.348    | 69131198 | 21.685     | 24.491   | 91.1735 |
| 25.134    | 6692584  | 24.501     | 26.763   | 8.8265  |



### 4-Fluorophenyl methyl sulfoxide

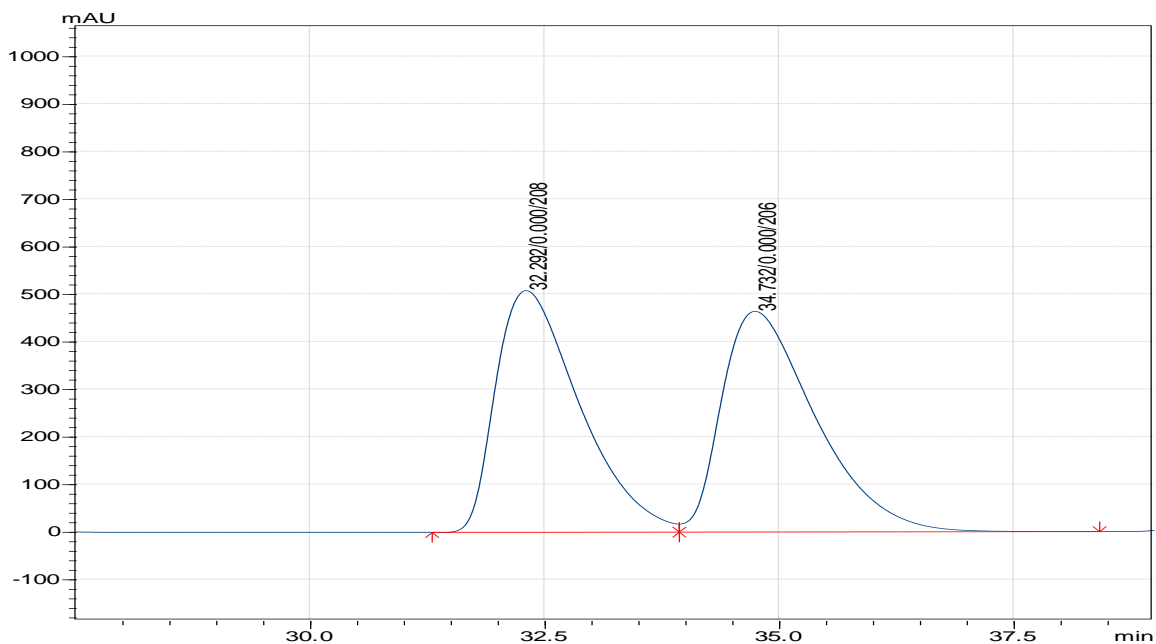

| Ret. Time | Area     | Peak Start | Peak End | Area%   |
|-----------|----------|------------|----------|---------|
| 32.292    | 31637611 | 31.296     | 33.931   | 49.4862 |
| 34.732    | 32294609 | 33.931     | 38.411   | 50.5138 |

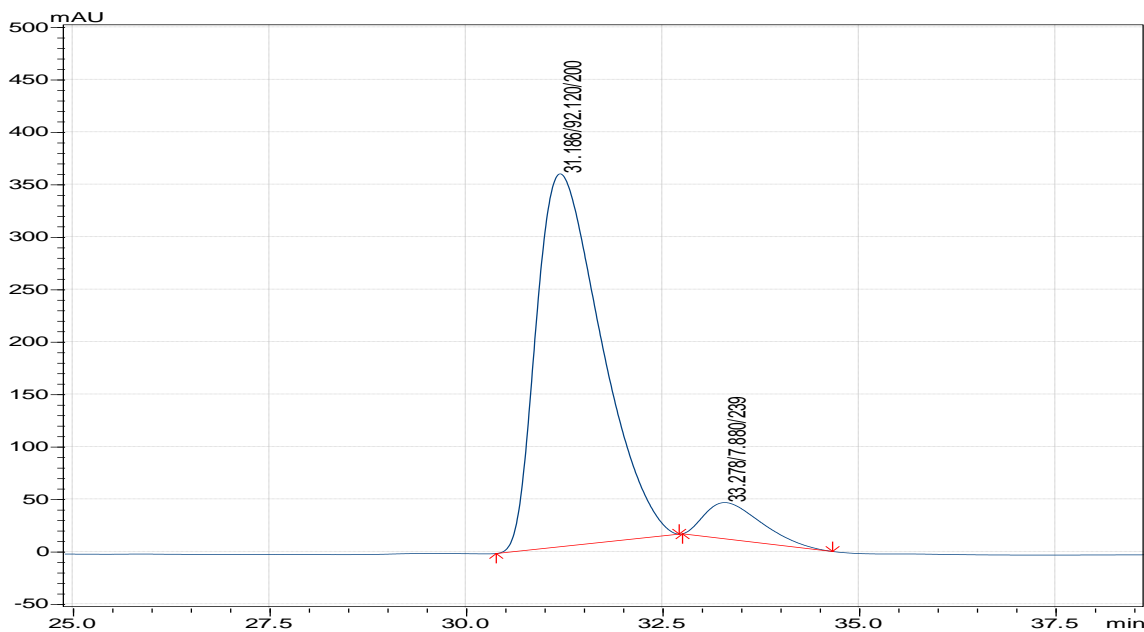

| Ret. Time | Area     | Peak Start | Peak End | Area%   |
|-----------|----------|------------|----------|---------|
| 31.186    | 20408120 | 30.379     | 32.704   | 92.1199 |
| 33.278    | 1745743  | 32.747     | 34.656   | 7.8801  |

### 4-Chlorophenyl methyl sulfoxide

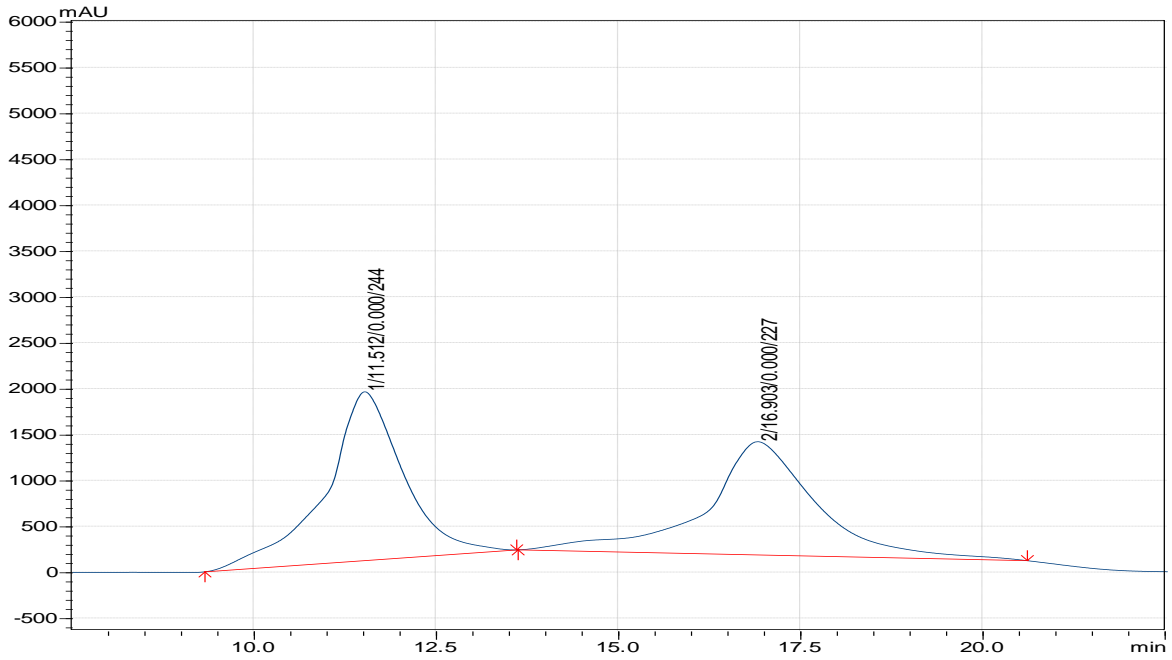

| Ret. Time | Area      | Peak Start | Peak End | Area%   |
|-----------|-----------|------------|----------|---------|
| 11.512    | 137217214 | 9.323      | 13.600   | 51.0558 |
| 16.903    | 131541922 | 13.621     | 20.608   | 48.9442 |

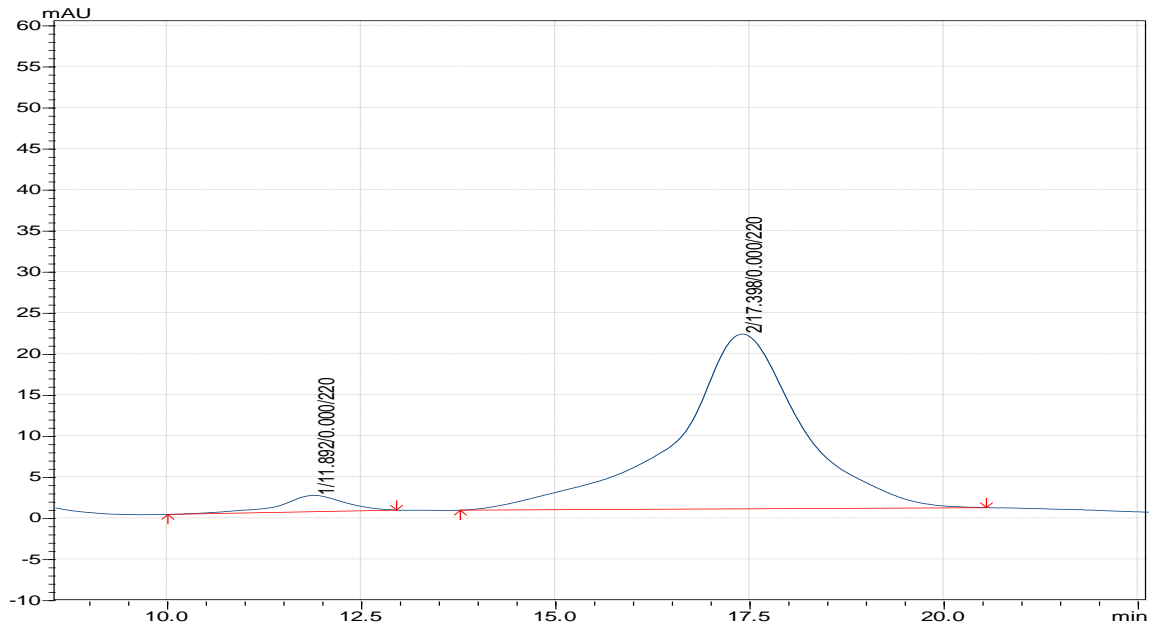

| Ret. Time | Area    | Peak Start | Peak End | Area%   |
|-----------|---------|------------|----------|---------|
| 11.892    | 115325  | 10.005     | 12.949   | 4.6079  |
| 17.398    | 2387451 | 13.771     | 20.544   | 95.3921 |

### 4-Bromophenyl methyl sulfoxide

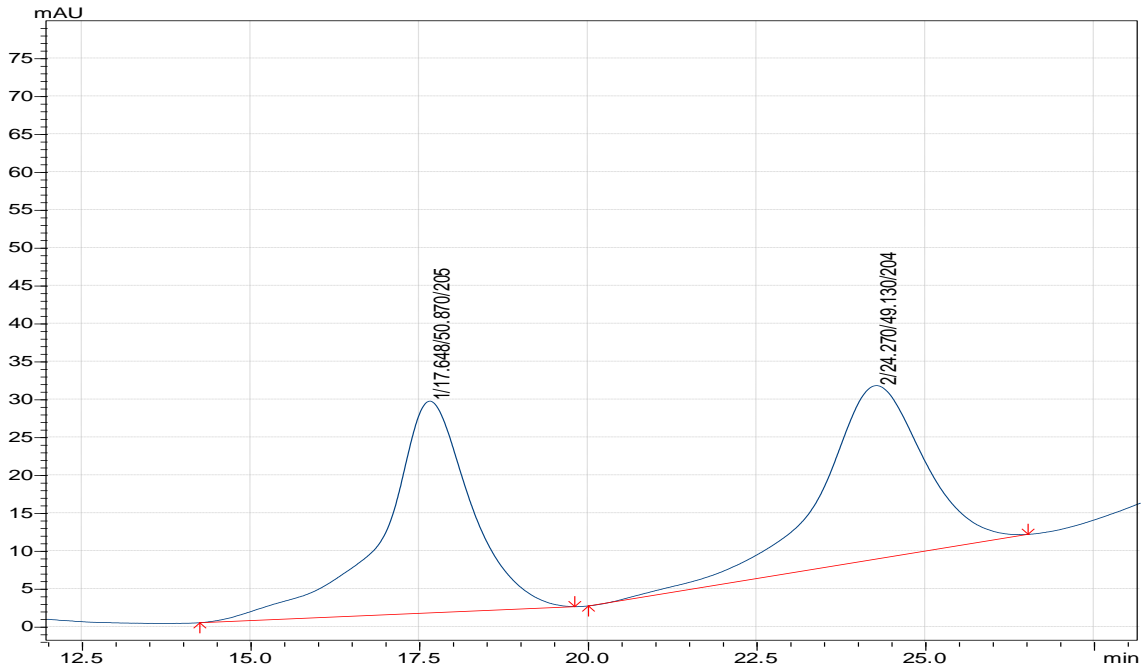

| Ret. Time | Area    | Peak Start | Peak End | Area%   |
|-----------|---------|------------|----------|---------|
| 17.648    | 2543207 | 14.240     | 19.797   | 50.8699 |
| 24.270    | 2456222 | 20.000     | 26.517   | 49.1301 |

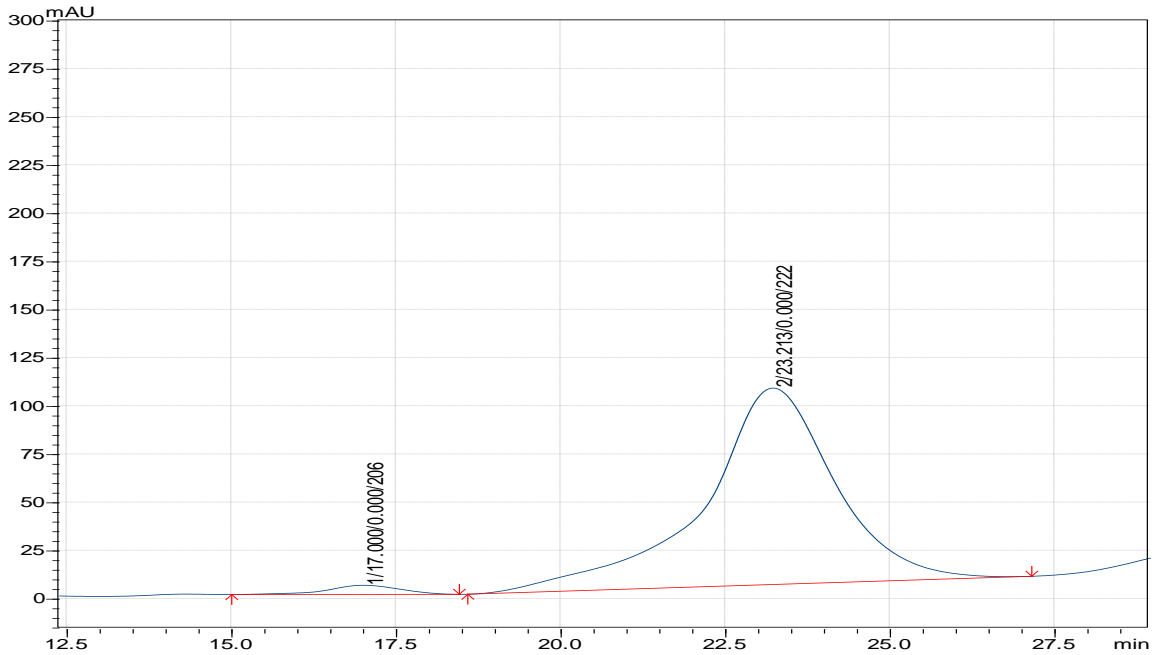

| Ret. Time | Area     | Peak Start | Peak End | Area%   |
|-----------|----------|------------|----------|---------|
| 17.000    | 364499   | 14.997     | 18.453   | 2.5191  |
| 23.213    | 14104768 | 18.581     | 27.147   | 97.4809 |

### 4-Nitrophenyl methyl sulfoxide

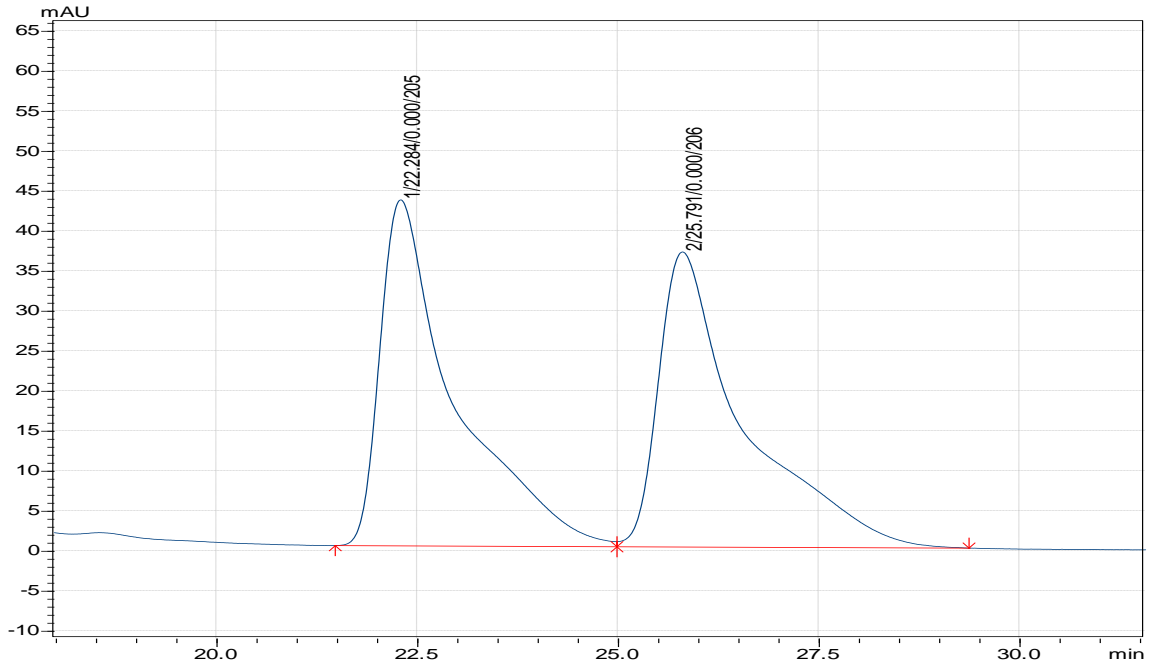

| Ret. Time | Area    | Peak Start | Peak End | Area%   |
|-----------|---------|------------|----------|---------|
| 22.284    | 2792446 | 21.472     | 24.981   | 50.7877 |
| 25.791    | 2705822 | 24.981     | 29.365   | 49.2123 |

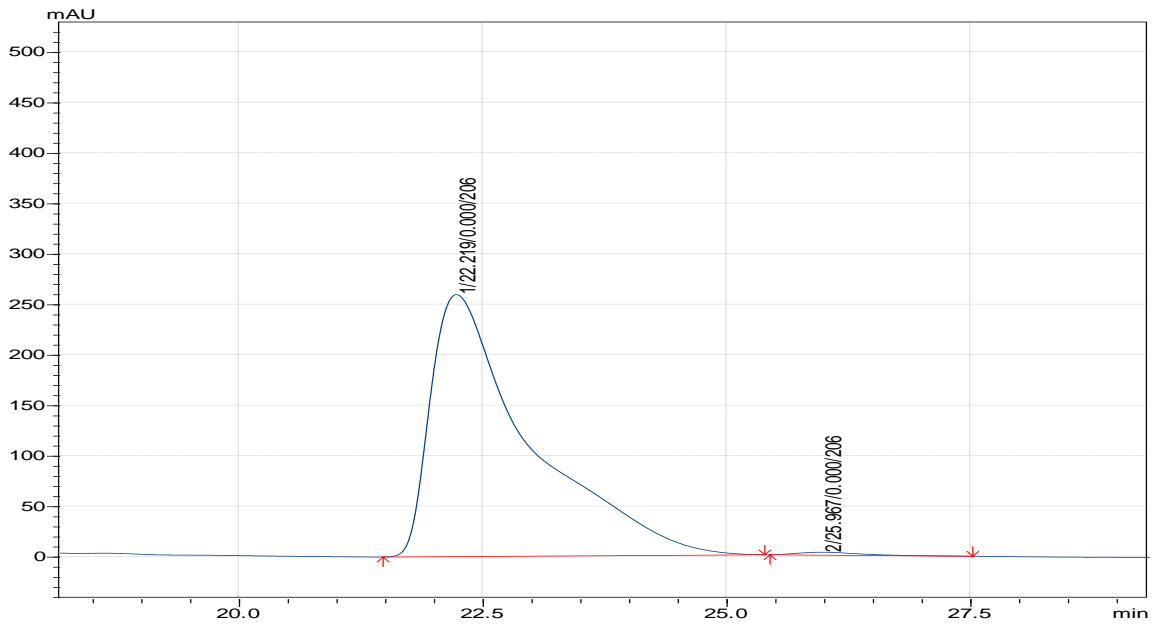

| Ret. Time | Area     | Peak Start | Peak End | Area%   |
|-----------|----------|------------|----------|---------|
| 22.219    | 18248354 | 21.472     | 25.387   | 99.2883 |
| 25.967    | 130800   | 25.440     | 27.520   | 0.7117  |

### 3-Chlorophenyl methyl sulfoxide

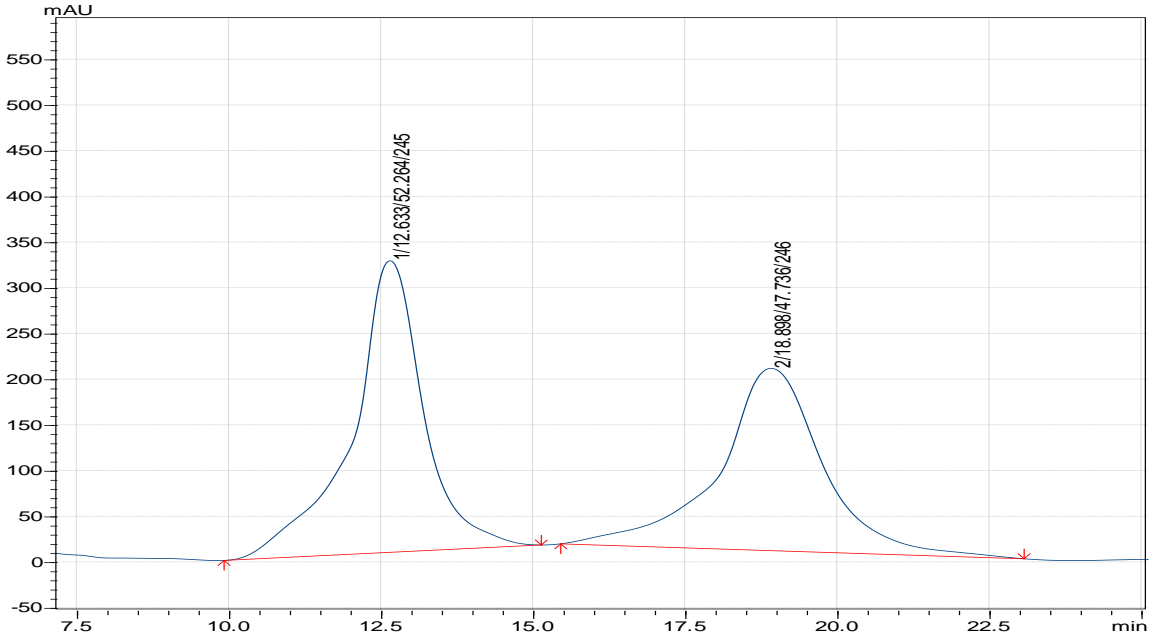

| Ret. Time | Area     | Peak Start | Peak End | Area%   |
|-----------|----------|------------|----------|---------|
| 12.633    | 26021813 | 9.909      | 15.125   | 52.2636 |
| 18.898    | 23767762 | 15.445     | 23.061   | 47.7364 |

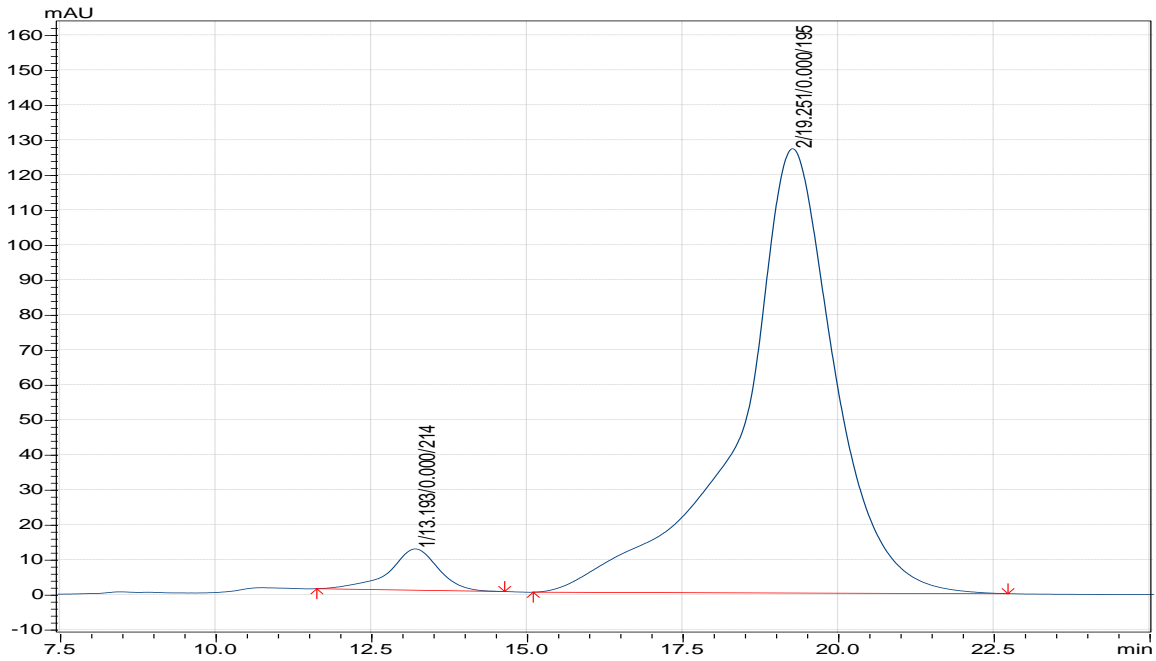

| Ret. Time | Area     | Peak Start | Peak End | Area%   |
|-----------|----------|------------|----------|---------|
| 13.193    | 647804   | 11.616     | 14.635   | 4.5745  |
| 19.251    | 13513369 | 15.093     | 22.720   | 95.4255 |

### 3-Bromophenyl methyl sulfoxide

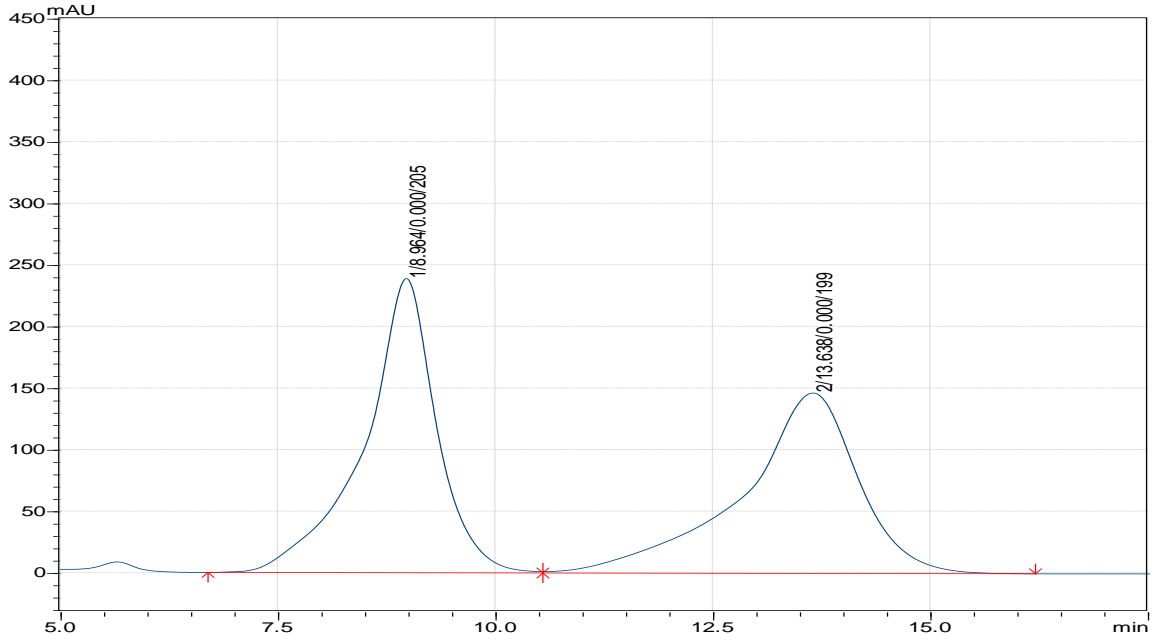

| Ret. Time | Area     | Peak Start | Peak End | Area%   |
|-----------|----------|------------|----------|---------|
| 8.964     | 13780885 | 6.688      | 10.539   | 50.4502 |
| 13.638    | 13534941 | 10.539     | 16.203   | 49.5498 |

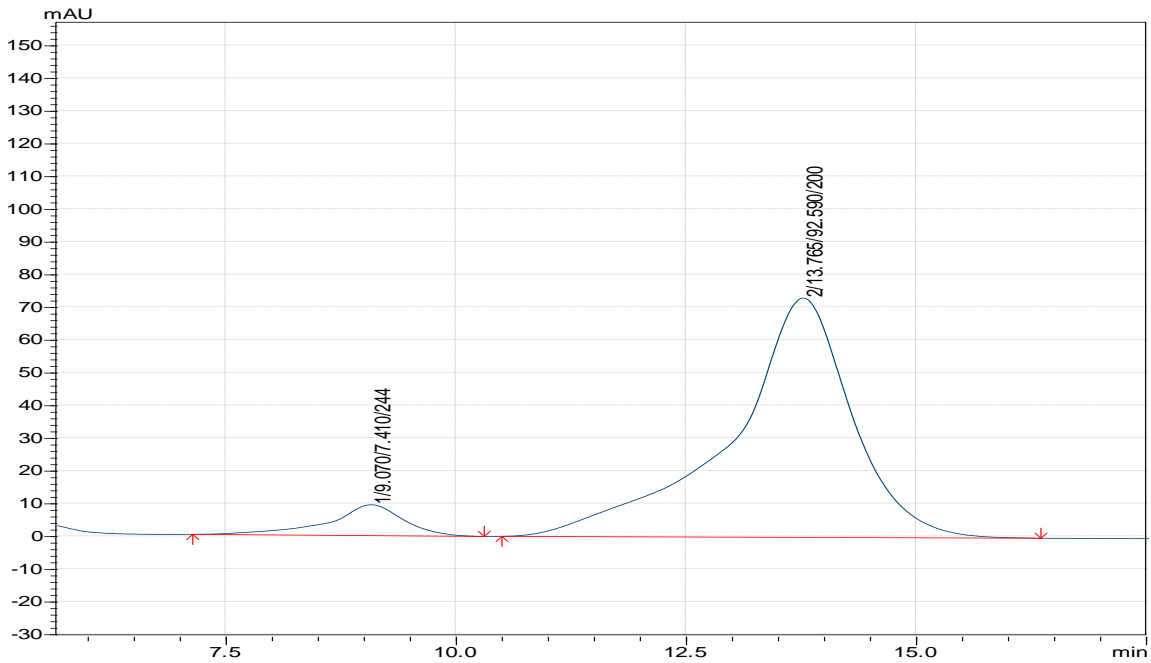

| Ret. Time | Area    | Peak Start | Peak End | Area%   |
|-----------|---------|------------|----------|---------|
| 9.070     | 533372  | 7.136      | 10.304   | 7.4104  |
| 13.765    | 6664206 | 10.496     | 16.352   | 92.5896 |

# Ethyl phenyl sulfoxide

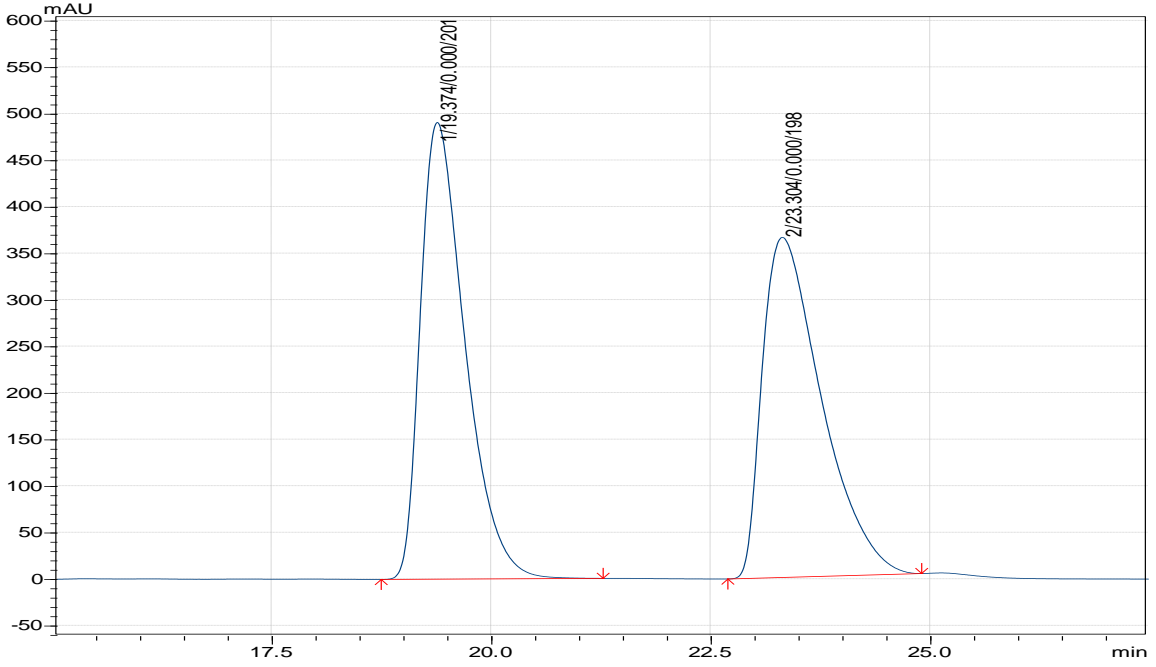

| Ret. Time | Area     | Peak Start | Peak End | Area%   |
|-----------|----------|------------|----------|---------|
| 19.374    | 17333087 | 18.741     | 21.269   | 50.3180 |
| 23.304    | 17114006 | 22.688     | 24.896   | 49.6820 |

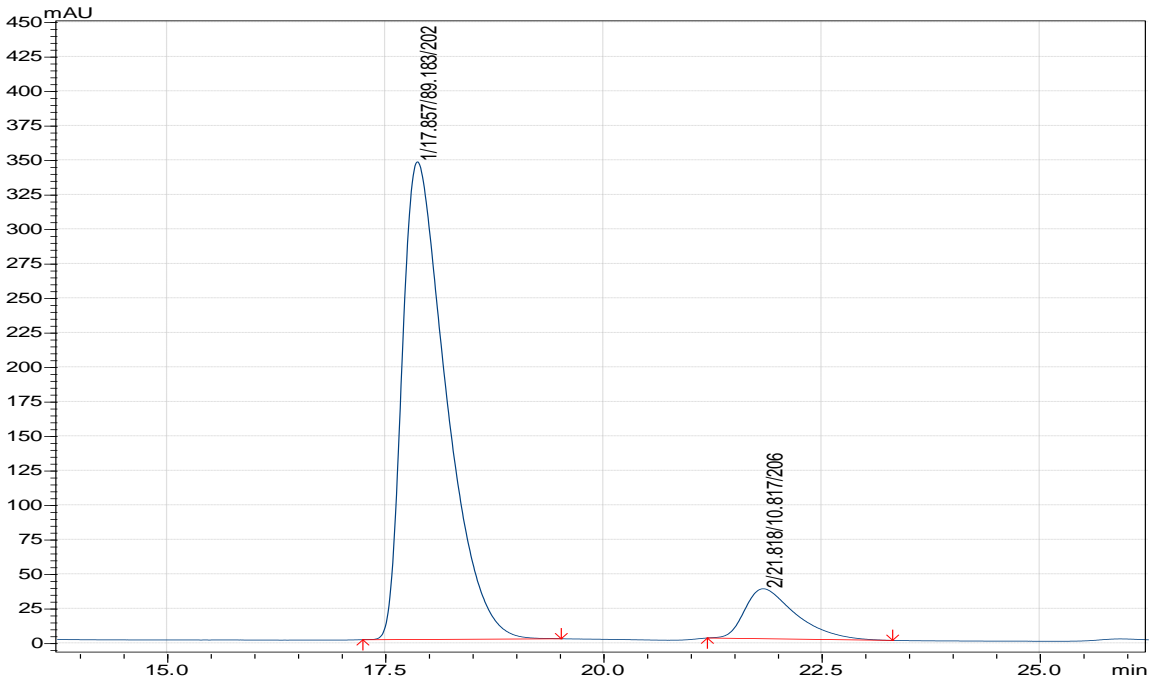

| Ret. Time | Area     | Peak Start | Peak End | Area%   |
|-----------|----------|------------|----------|---------|
| 17.857    | 12123714 | 17.237     | 19.509   | 89.1831 |
| 21.818    | 1470476  | 21.184     | 23.307   | 10.8169 |

# Benzyl phenyl sulfoxide

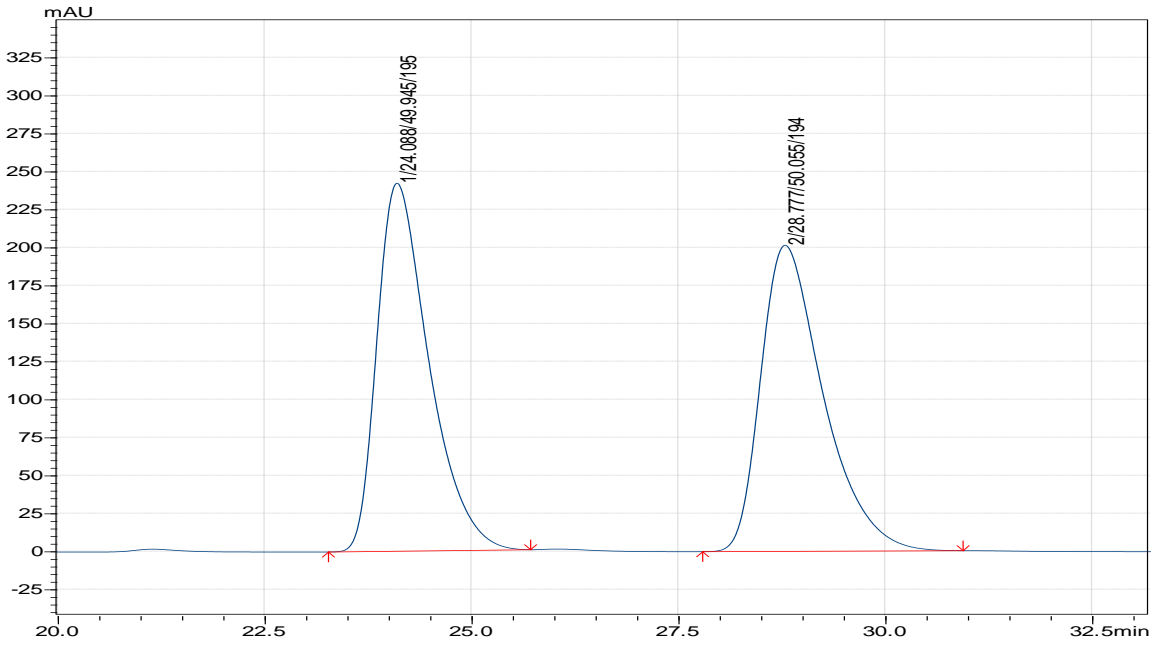

| Ret. Time | Area     | Peak Start | Peak End | Area%   |
|-----------|----------|------------|----------|---------|
| 24.088    | 10564866 | 23.264     | 25.707   | 49.9445 |
| 28.777    | 10588329 | 27.787     | 30.933   | 50.0555 |

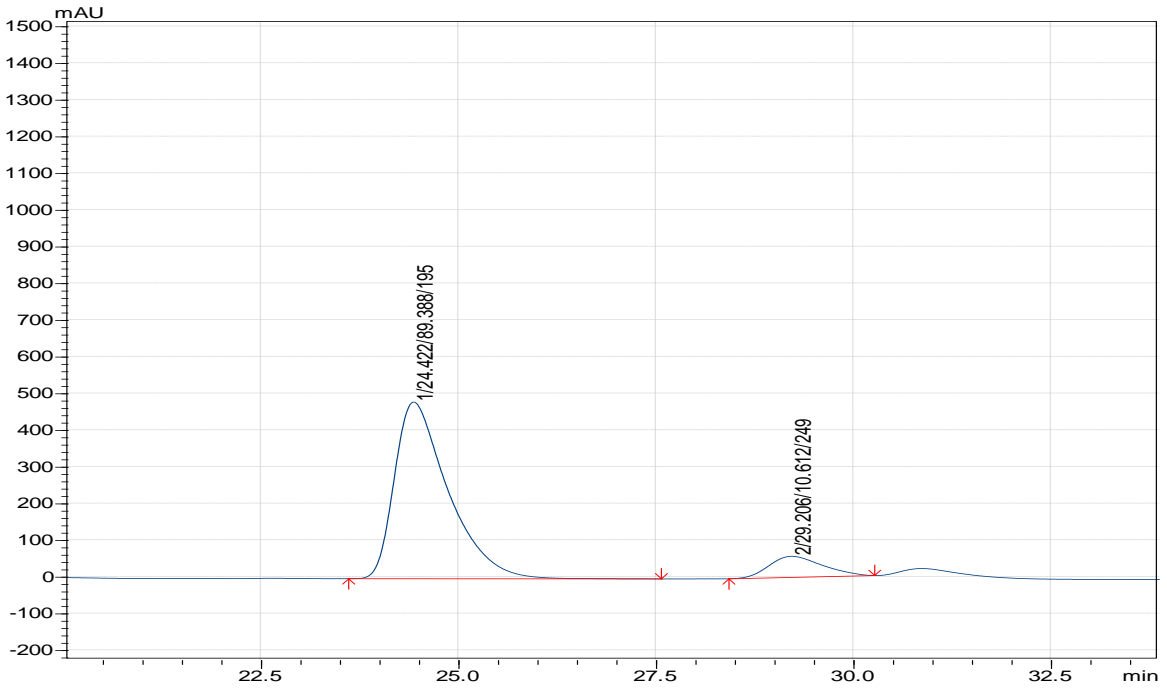

| Ret. Time | Area     | Peak Start | Peak End | Area%   |
|-----------|----------|------------|----------|---------|
| 24.422    | 22748110 | 23.605     | 27.563   | 89.3881 |
| 29.206    | 2700577  | 28.416     | 30.261   | 10.6119 |



**(+)-trans-(1*S*,2*S*)-2-Phenyl-1,3-dithiane 1-oxide**

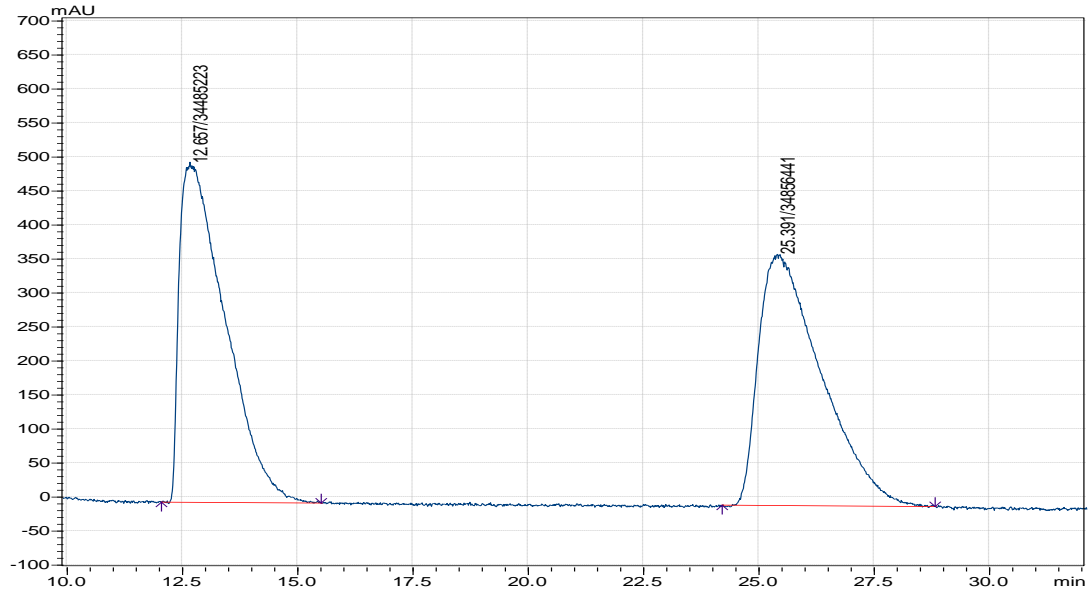

| Ret. Time | Area     | Peak Start | Peak End | Area%   |
|-----------|----------|------------|----------|---------|
| 12.657    | 34485223 | 12.043     | 15.509   | 49.7323 |
| 25.391    | 34856441 | 24.203     | 28.821   | 50.2677 |

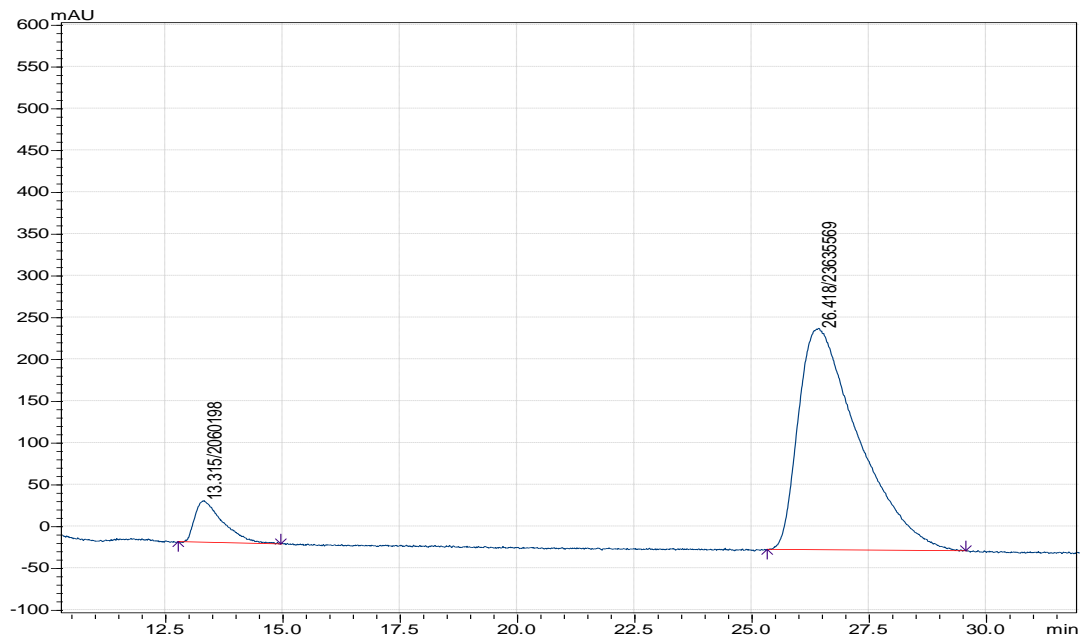

| Ret. Time | Area     | Peak Start | Peak End | Area%   |
|-----------|----------|------------|----------|---------|
| 13.315    | 2060198  | 12.768     | 14.955   | 8.0177  |
| 26.418    | 23635569 | 25.323     | 29.557   | 91.9823 |

**(+)-trans-2-(4-Methylphenyl)-1,3-dithiane 1-oxide**

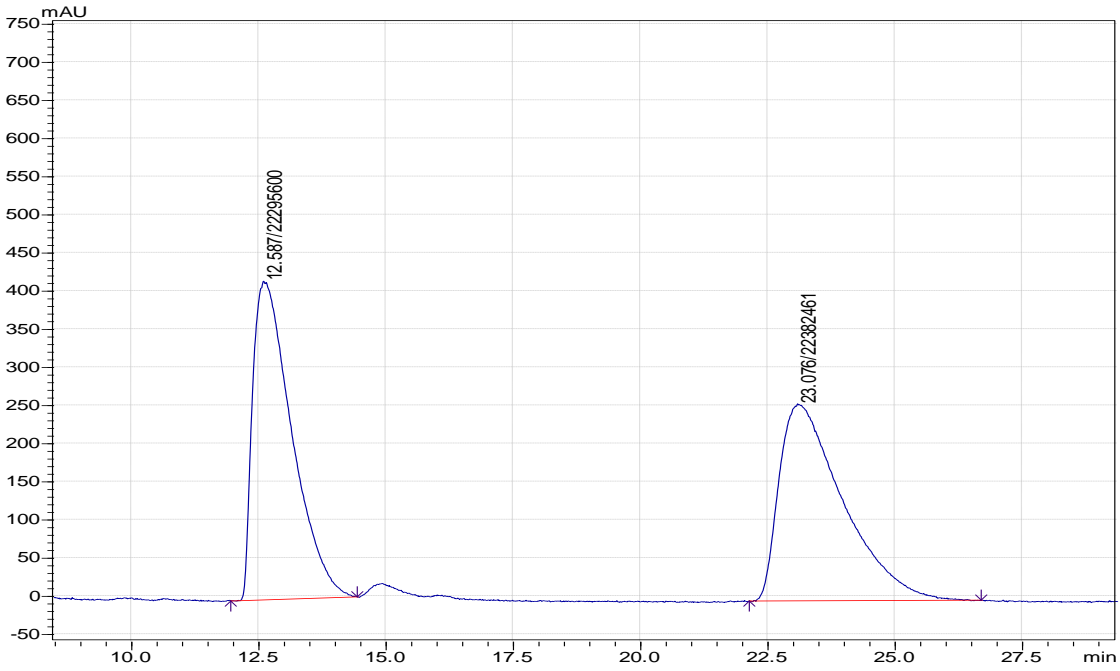

| Ret. Time | Area     | Peak Start | Peak End | Area%   |
|-----------|----------|------------|----------|---------|
| 12.587    | 22295600 | 11.947     | 14.432   | 49.9028 |
| 23.076    | 22382461 | 22.133     | 26.688   | 50.0972 |

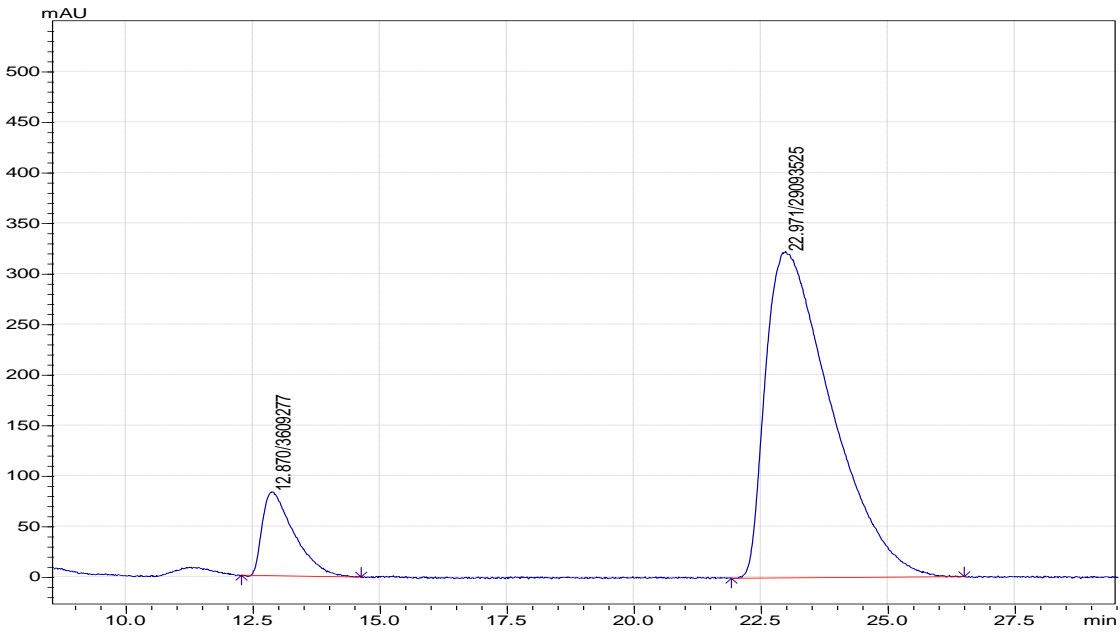

| Ret. Time | Area     | Peak Start | Peak End | Area%   |
|-----------|----------|------------|----------|---------|
| 12.870    | 3609277  | 12.267     | 14.624   | 11.0366 |
| 22.971    | 29093525 | 21.909     | 26.496   | 88.9634 |

**(+)-trans-2-(4-Chlorophenyl)-1,3-dithiane 1-Oxide**

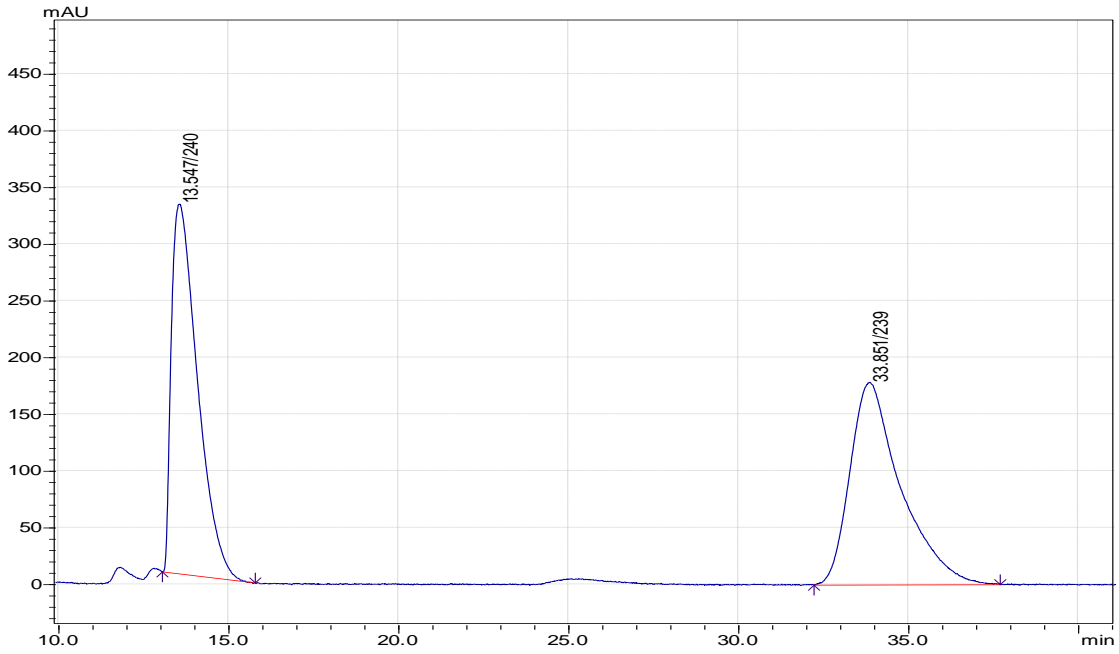

| Ret. Time | Area     | Peak Start | Peak End | Area%   |
|-----------|----------|------------|----------|---------|
| 13.547    | 17428268 | 13.045     | 15.776   | 48.3763 |
| 33.851    | 18598214 | 32.213     | 37.696   | 51.6237 |

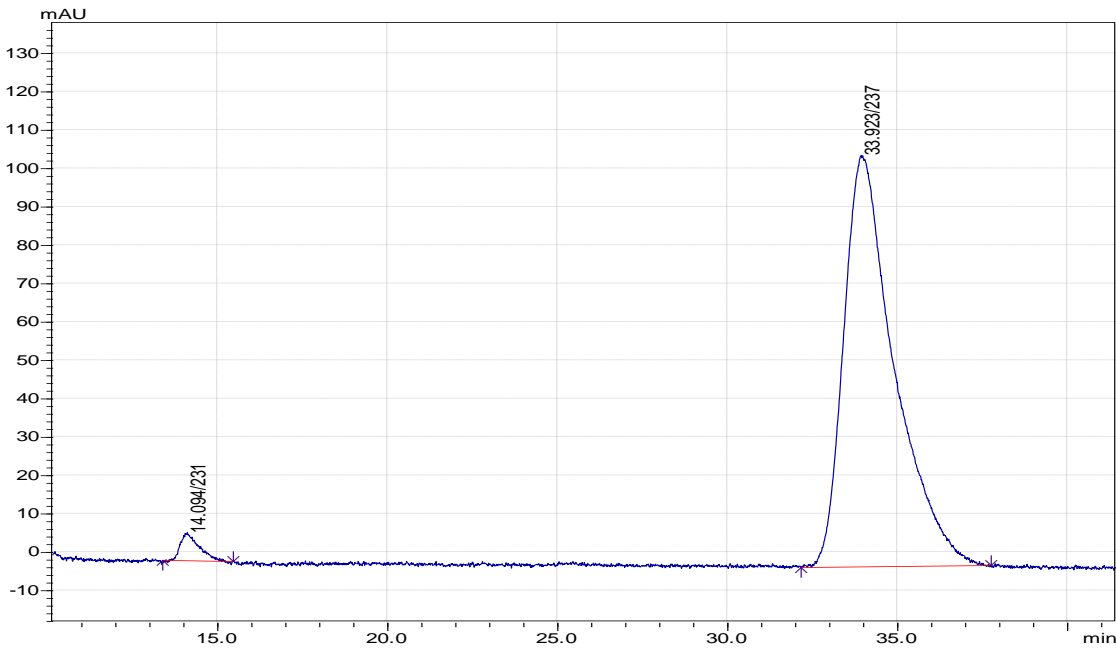

| Ret. Time | Area     | Peak Start | Peak End | Area%   |
|-----------|----------|------------|----------|---------|
| 14.094    | 269884   | 13.376     | 15.456   | 2.3737  |
| 33.923    | 11100093 | 32.160     | 37.749   | 97.6263 |

**(+)-trans-2-(2-Fluorophenyl)-1,3-dithiane 1-oxide**

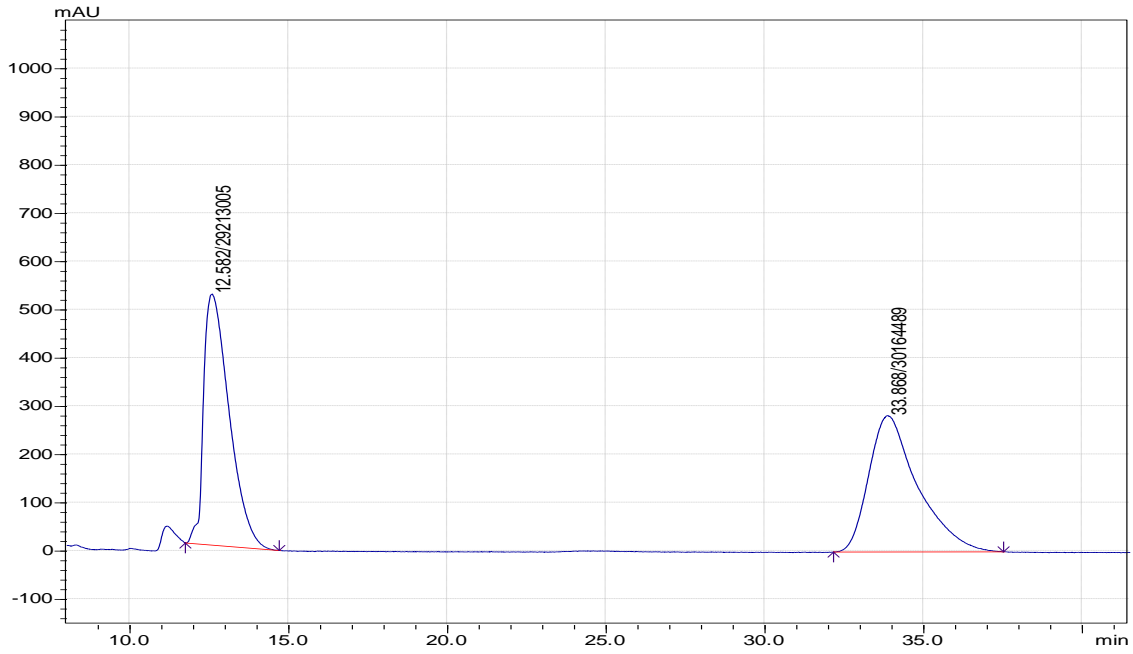

| Ret. Time | Area     | Peak Start | Peak End | Area%   |
|-----------|----------|------------|----------|---------|
| 12.582    | 29213005 | 11.744     | 14.699   | 49.1988 |
| 33.868    | 30164489 | 32.160     | 37.515   | 50.8012 |

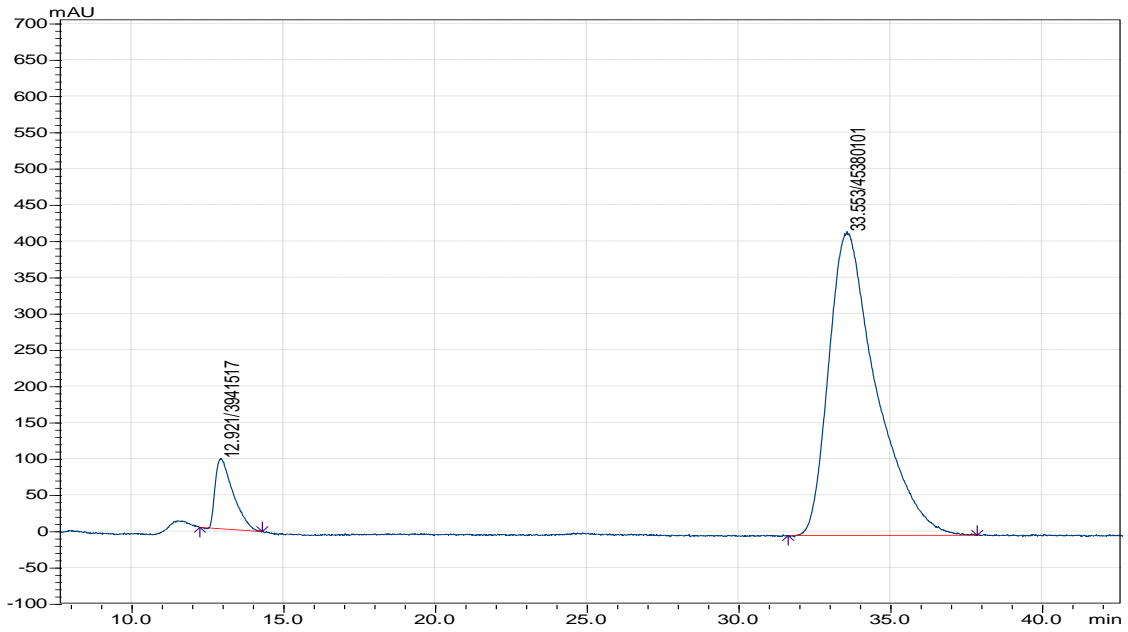

| Ret. Time | Area     | Peak Start | Peak End | Area%   |
|-----------|----------|------------|----------|---------|
| 12.921    | 3941517  | 12.235     | 14.293   | 7.9915  |
| 33.553    | 45380101 | 31.616     | 37.845   | 92.0085 |

## 5. Notes and references

- 1 J. Legros, C. Bolm, *Chem. Eur. J.*, 2005, **11**, 1086-1092.
- 2 J. Sun, C. Zhu, Z. Dai, M. Yang, Y. Pan, H. Hu, *J. Org. Chem.* 2004, **69**, 8500-8503.
- 3 S. Liaoa, B. List, *Adv. Synth. Catal.*, 2012, **354**, 2363-2367.
- 4 T. Yamaguchi, K. Matsumoto, B. Saito, T. Katsuki, *Angew. Chem. Int. Ed.*, 2007, **46**, 4729-4731.
- 5 Z. M. Liu, H. Zhao, M. Q. Li, Y. B. Lan, Q. B. Yao, J. C. Tao and X. W. Wang, *Adv. Synth. Catal.*, 2012, **354**, 1012-1022.
